# Supplementary material for: A Self-Assembling NHC-Pd-Loaded Calixarene as a Potent Catalyst for the Suzuki-Miyaura Cross-Coupling Reaction in Water
Source: PubMed Central journal article supplement (PMC7146153; doi:10.3390/molecules25061459), 2020-03-24

# A Self-Assembling NHC-Palladium-Loaded Calixarene as a Potent Catalyst for the Suzuki-Miyaura Cross-coupling Reaction in Water

*Arnaud Peramo,<sup>1</sup> Ibrahim Abdellah,<sup>2</sup> Shannon Pecnard,<sup>1</sup> Julie*

*Mougin<sup>1</sup>, Cyril Martini,<sup>2,3</sup> Patrick Couvreur,<sup>1</sup> Vincent Huc,<sup>2,\*</sup> and*

*Didier Desmaële<sup>1\*</sup>*

<sup>1</sup> *Institut Galien Paris Sud, CNRS UMR8612, Université Paris Saclay, 5 rue Jean-Baptiste*

*Clément 92290 Châtenay-Malabry, France*

<sup>2</sup> *Institut de Chimie Moléculaire et des Matériaux d'Orsay, CNRS UMR8182, Université Paris*

*Saclay, Bâtiment 420, 91405 Orsay, France.*

<sup>3</sup> *NOVECAL, 86 rue de Paris, 91400 Orsay, France, [www.novecal.com](http://www.novecal.com)*

*Email : [vincent.huc@u-psud.fr](mailto:vincent.huc@u-psud.fr) and [didier.desmaele@u-psud.fr](mailto:didier.desmaele@u-psud.fr)*

## **<sup>1</sup>H and <sup>13</sup>C NMR Spectra of the synthesized compounds**

|                     |         |
|---------------------|---------|
| Compound <b>2a</b>  | page 2  |
| Compound <b>2e</b>  | page 3  |
| Compound <b>2f</b>  | page 4  |
| Compound <b>2g</b>  | page 5  |
| Compound <b>2h</b>  | page 6  |
| Compound <b>2i</b>  | page 7  |
| Compound <b>2j</b>  | page 8  |
| Compound <b>3a</b>  | page 9  |
| Compound <b>3d</b>  | page 10 |
| Compound <b>3e</b>  | page 11 |
| Compound <b>3f</b>  | page 12 |
| Compound <b>3h</b>  | page 13 |
| Compound <b>3i</b>  | page 14 |
| Compound <b>3j</b>  | page 15 |
| Compound <b>3af</b> | page 16 |
| Compound <b>3ag</b> | page 17 |

Compound **3ah**  
Compound **3ai**  
Compound **3aj**

page 18  
page 19  
page 20

### <sup>1</sup>H NMR **2a**

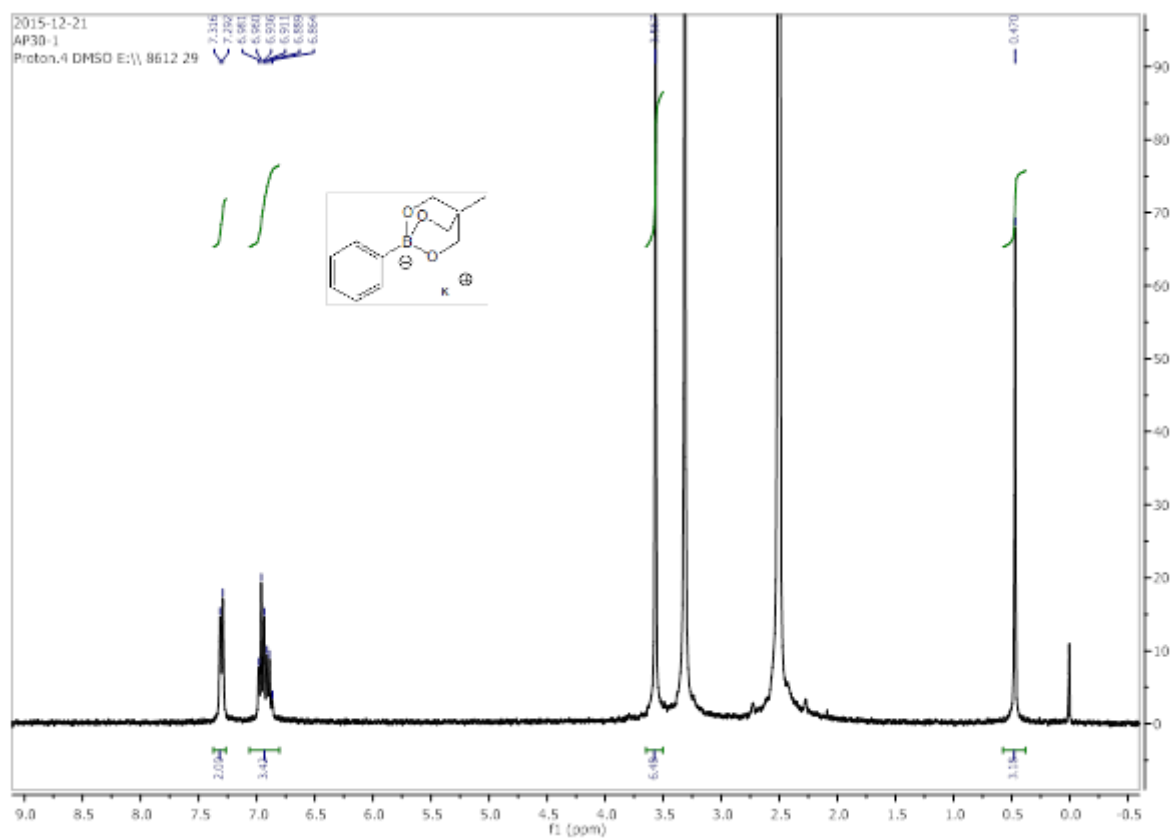

### <sup>13</sup>C NMR of **2a**

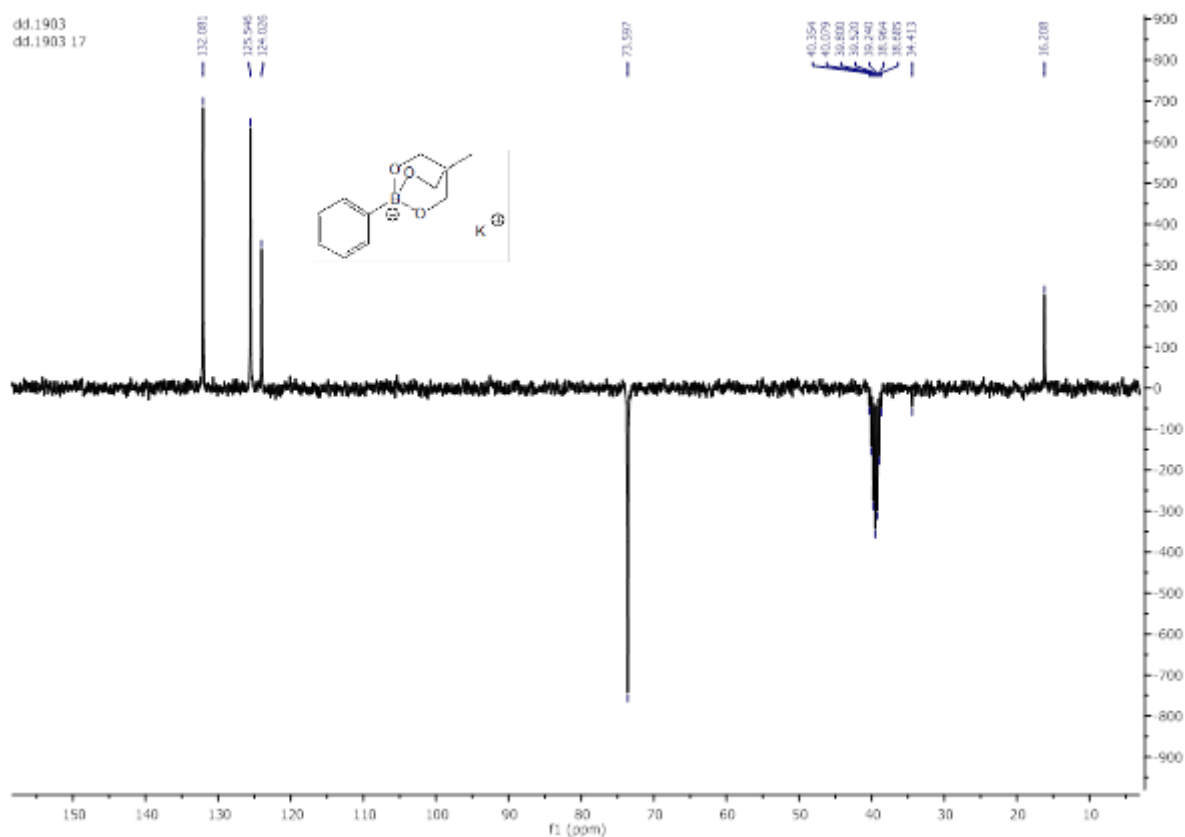

### <sup>1</sup>H NMR 2e

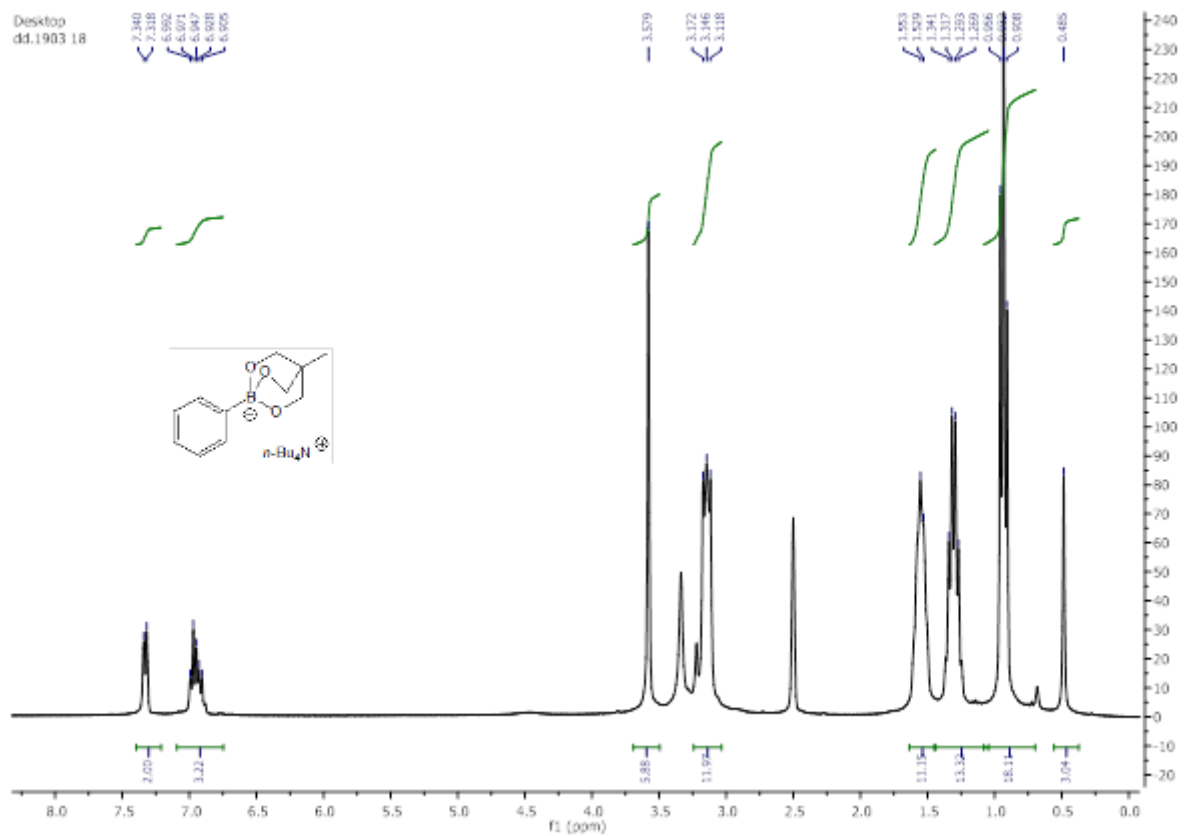

### <sup>13</sup>C NMR 2e

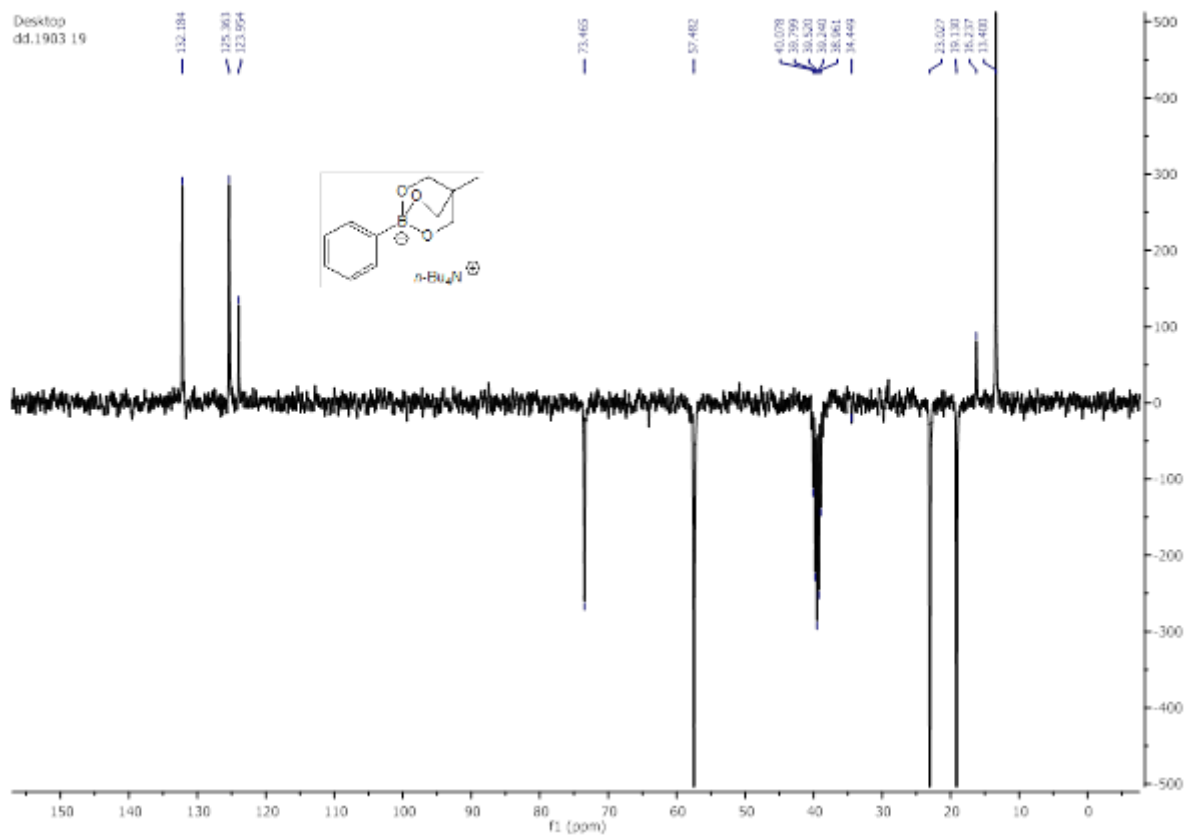

<sup>1</sup>H NMR **2f**

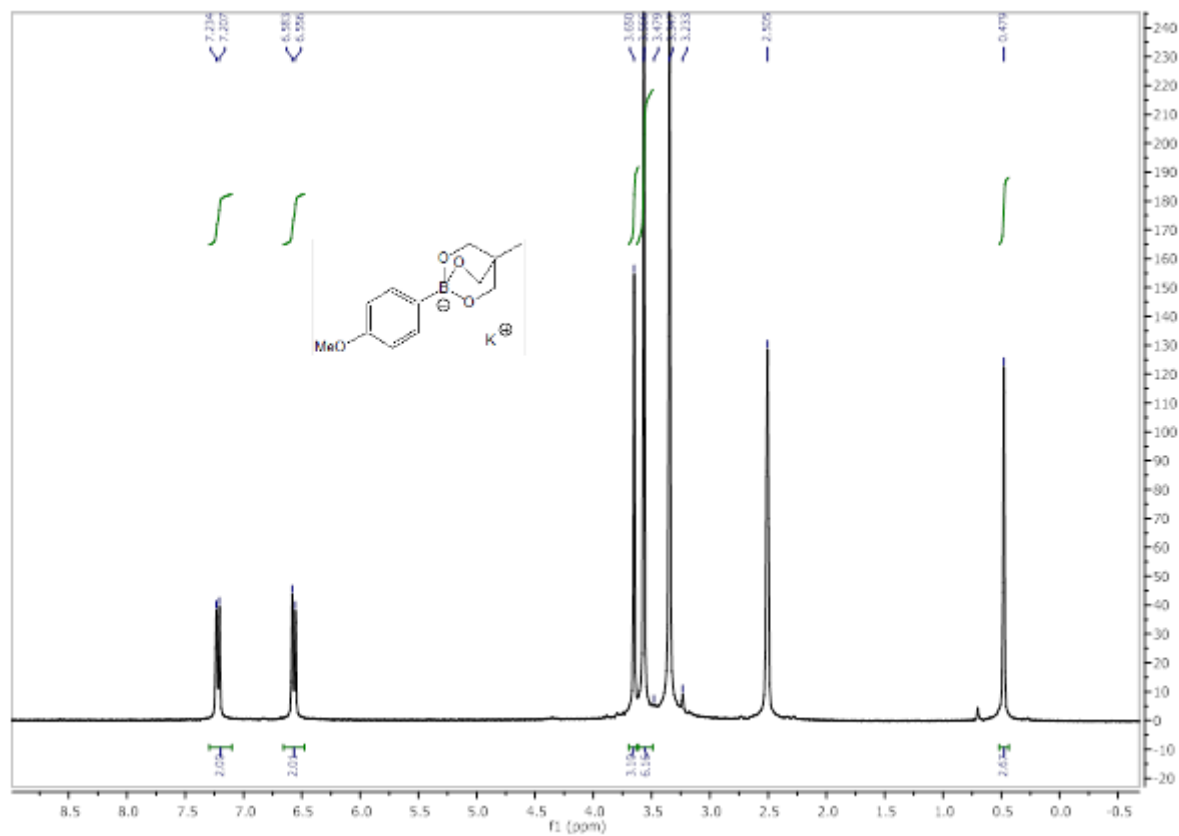

<sup>13</sup>C NMR **2f**

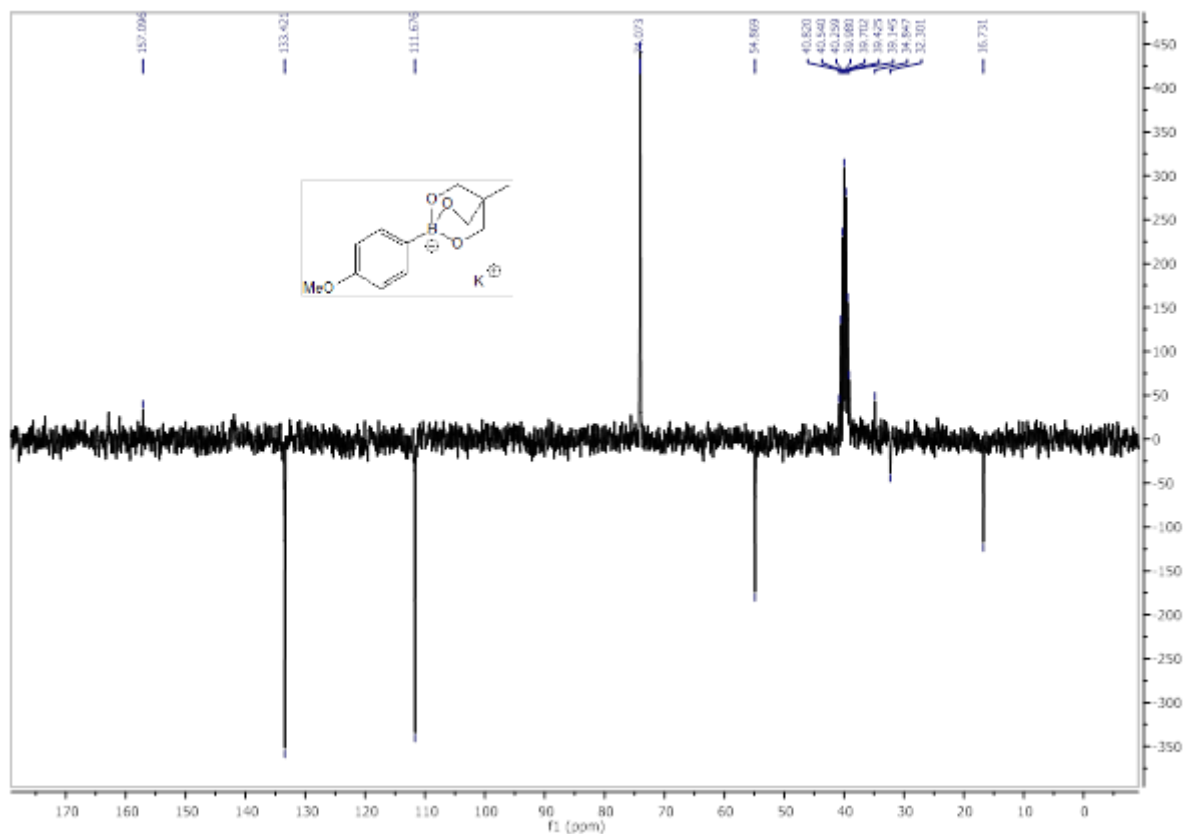

<sup>1</sup>H NMR 2g

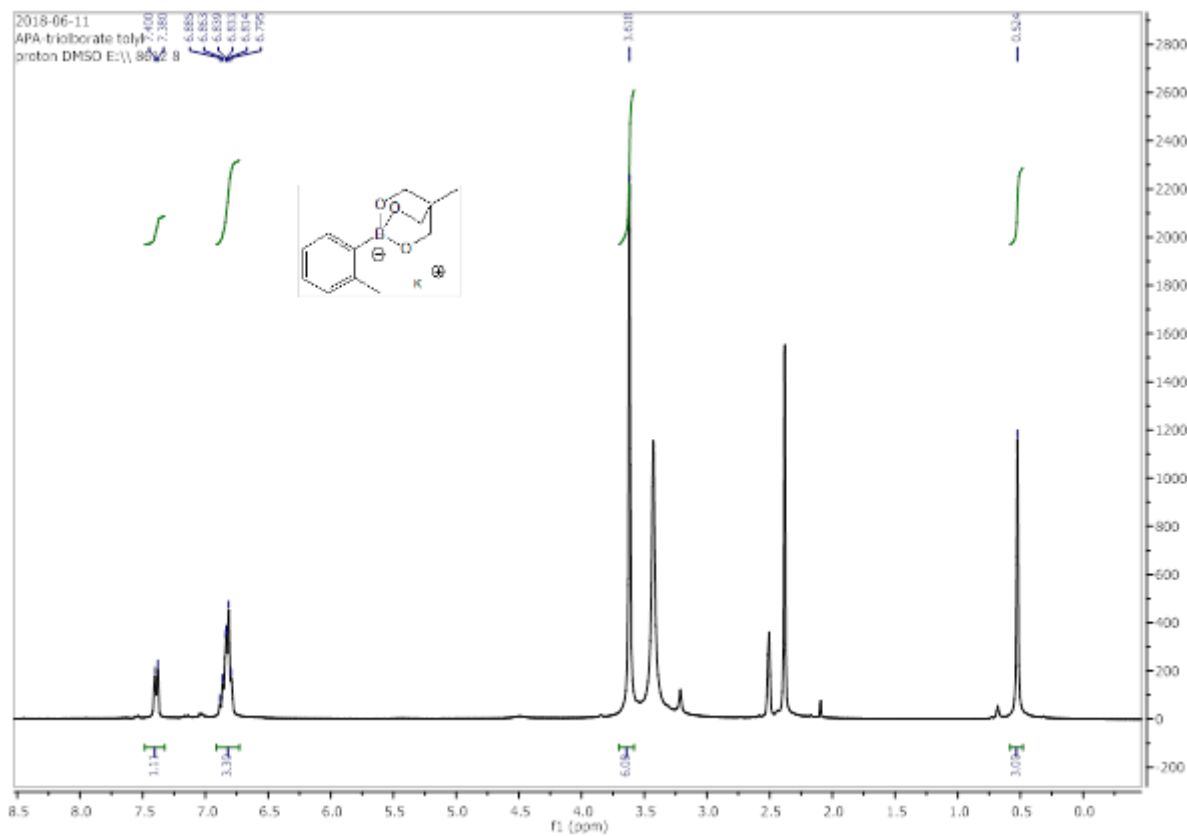

<sup>13</sup>C NMR 2g

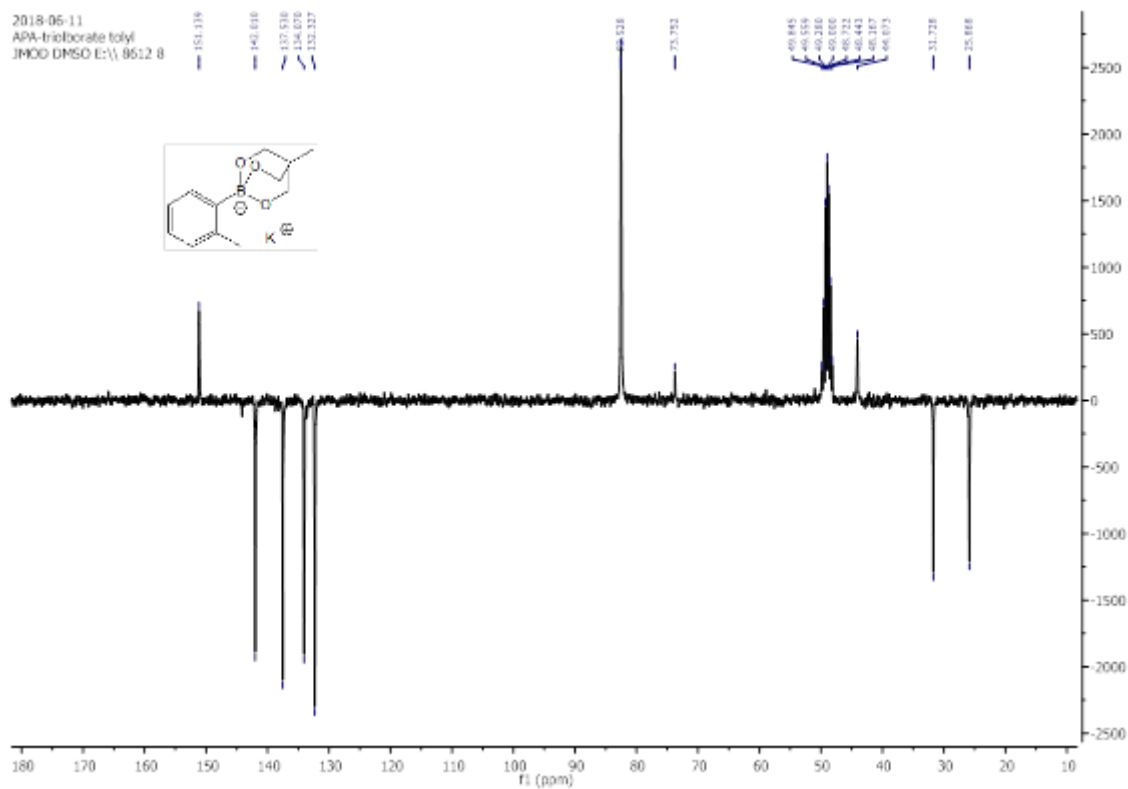

<sup>1</sup>H NMR 2h

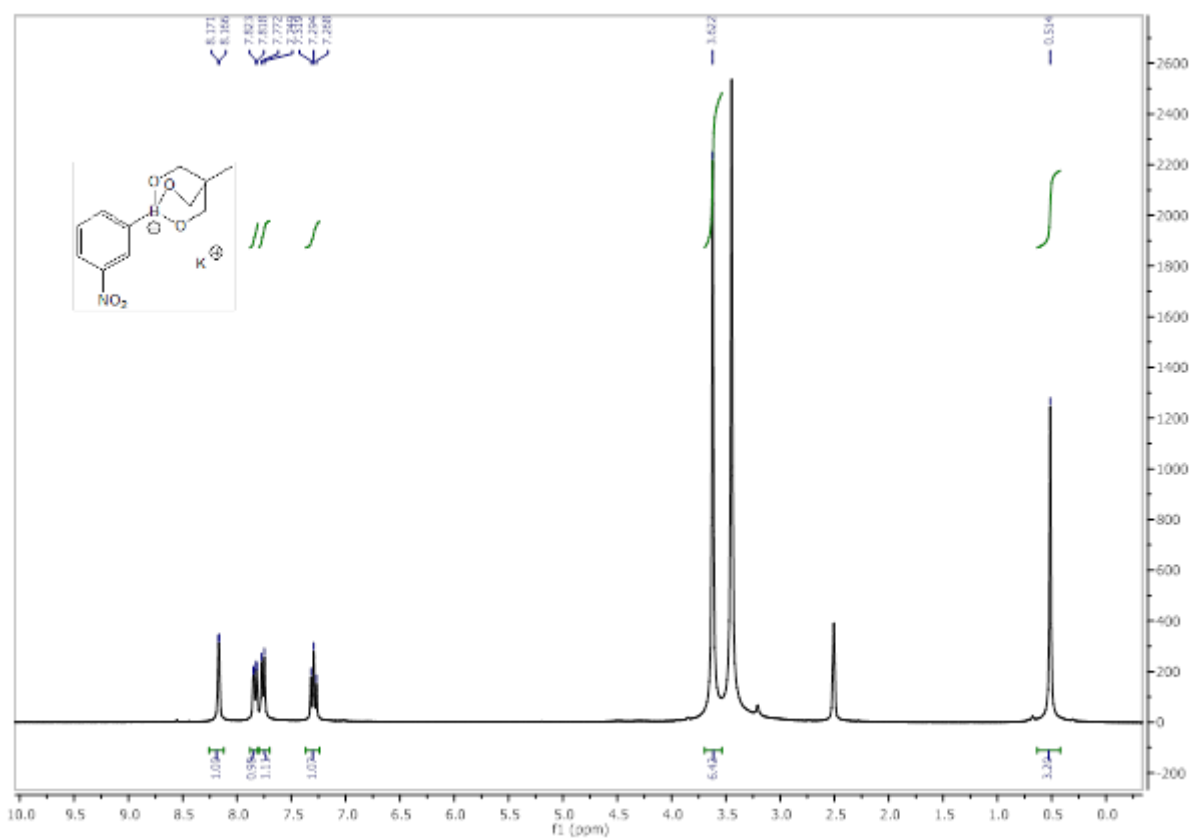

<sup>13</sup>C NMR 2h

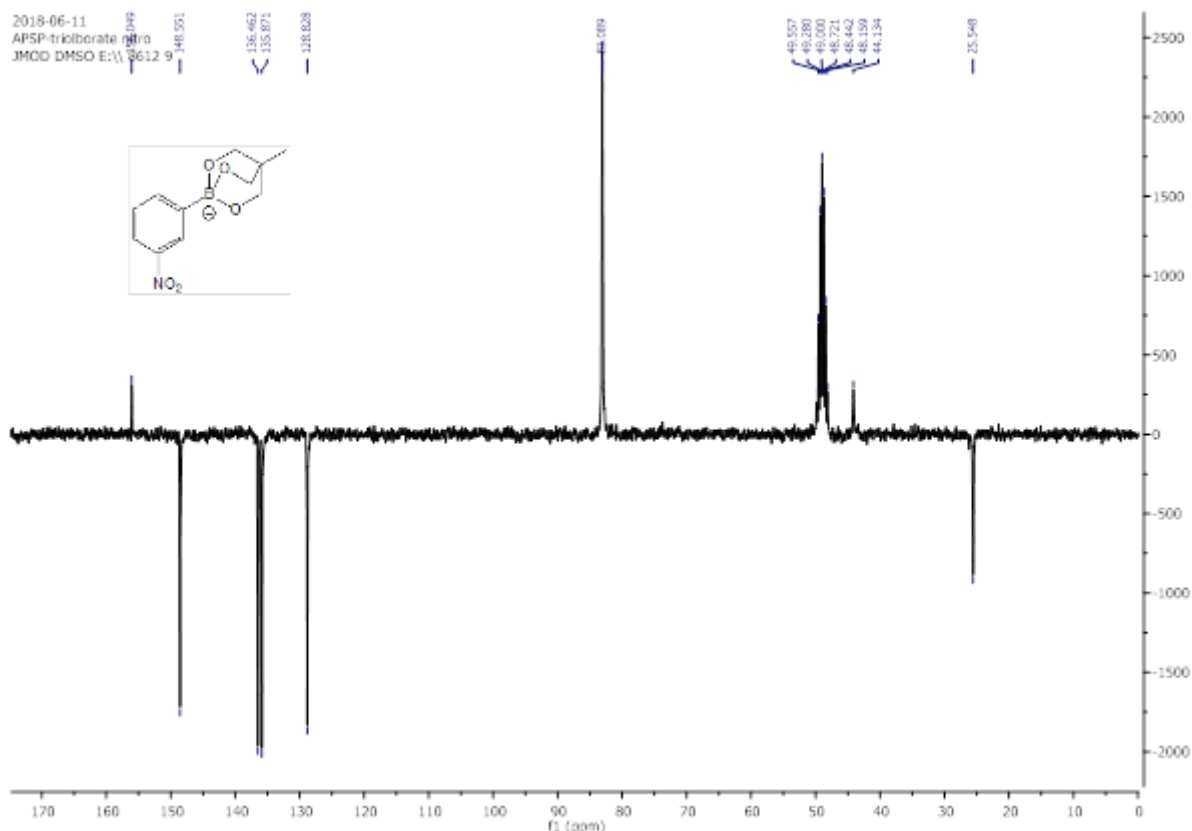

<sup>1</sup>H NMR of 2i

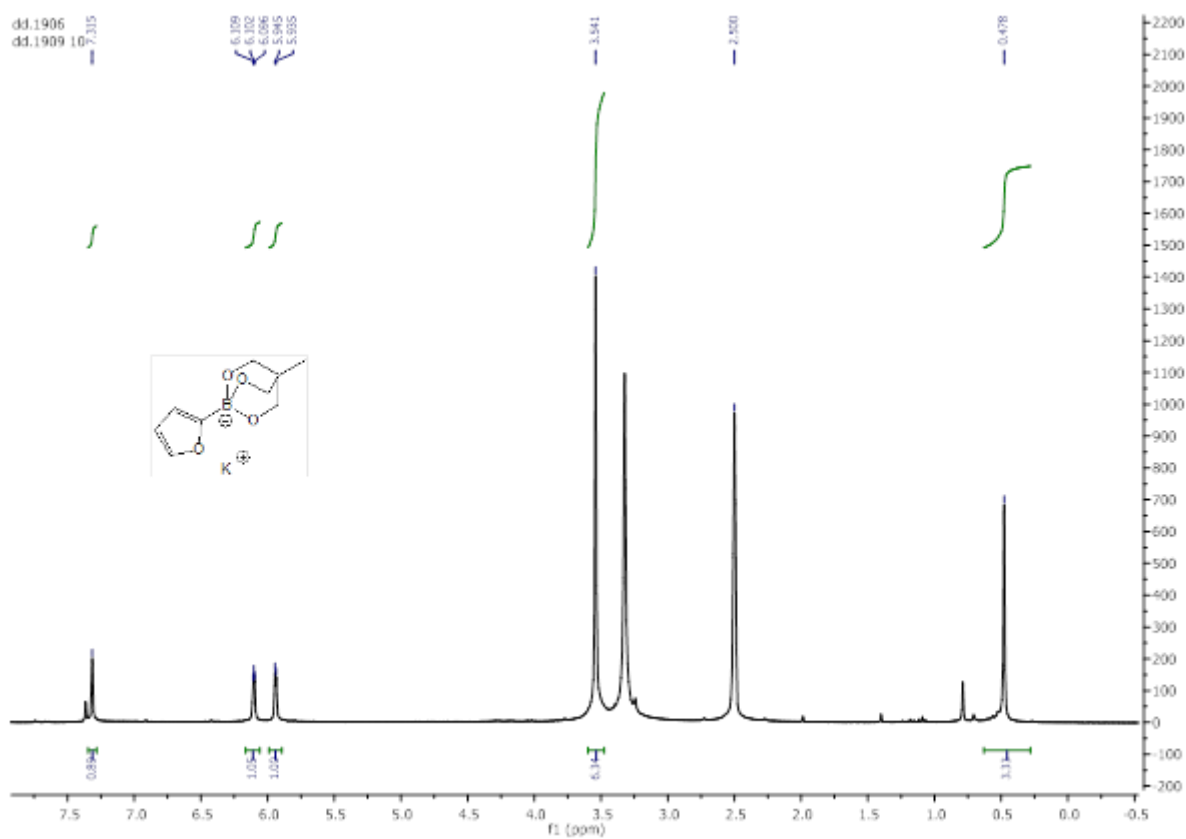

<sup>13</sup>C NMR 2i

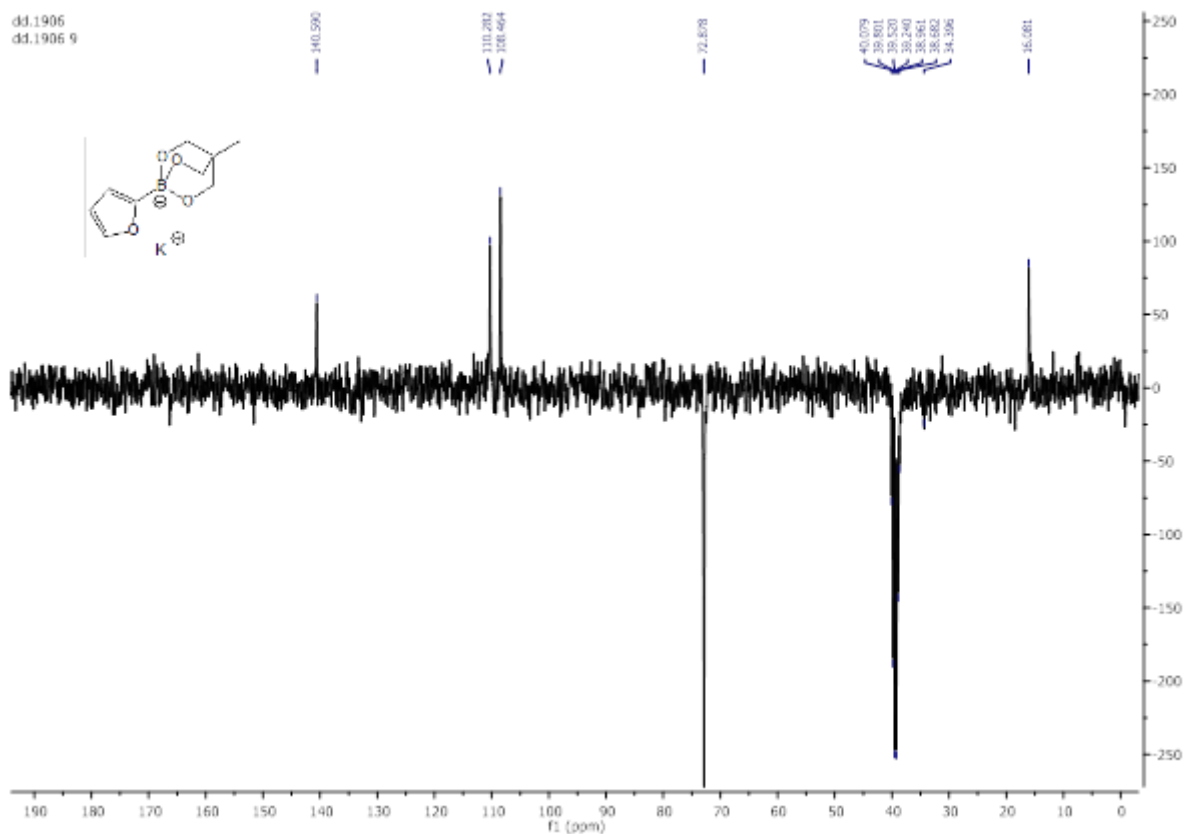

### <sup>1</sup>H NMR of 2j

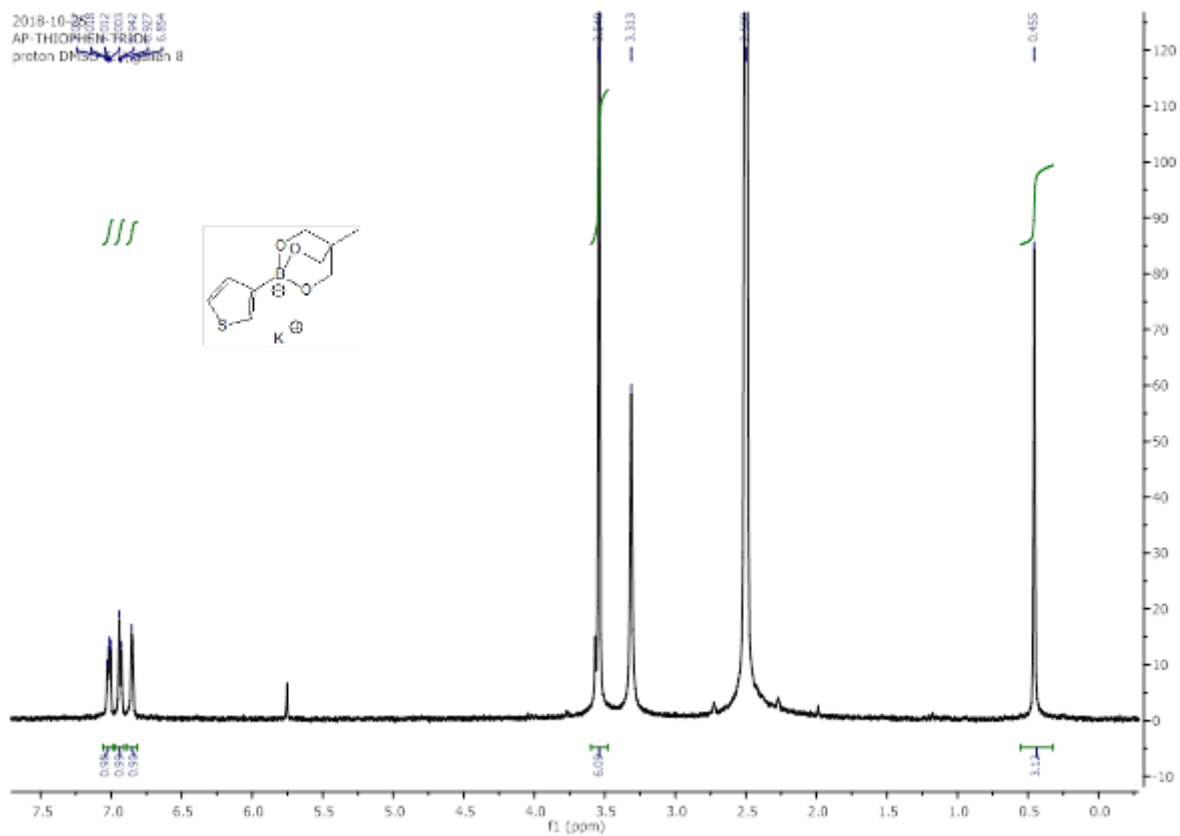

### <sup>13</sup>C NMR of 2j



2018-10-25  
AP-THIOPHEN-TRIOL  
JMGG DMSO E:\ galien 8

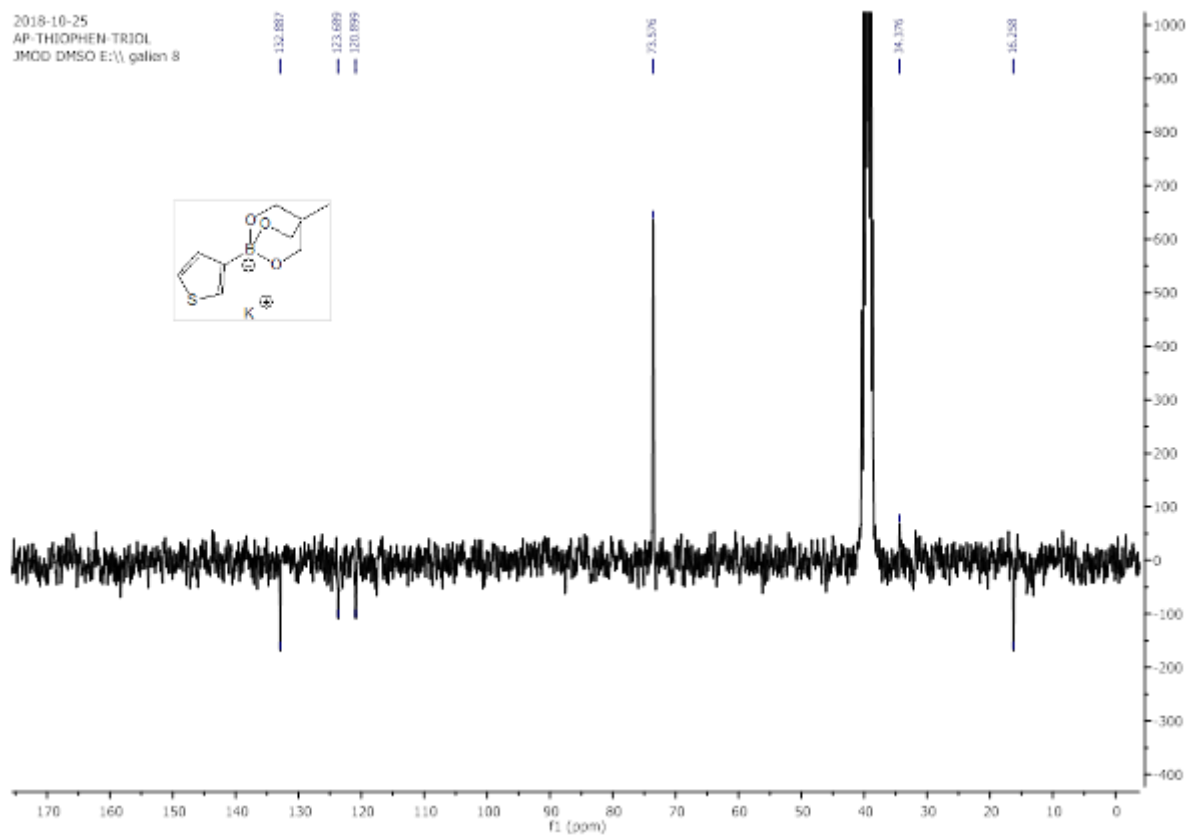

### <sup>1</sup>H NMR 3a

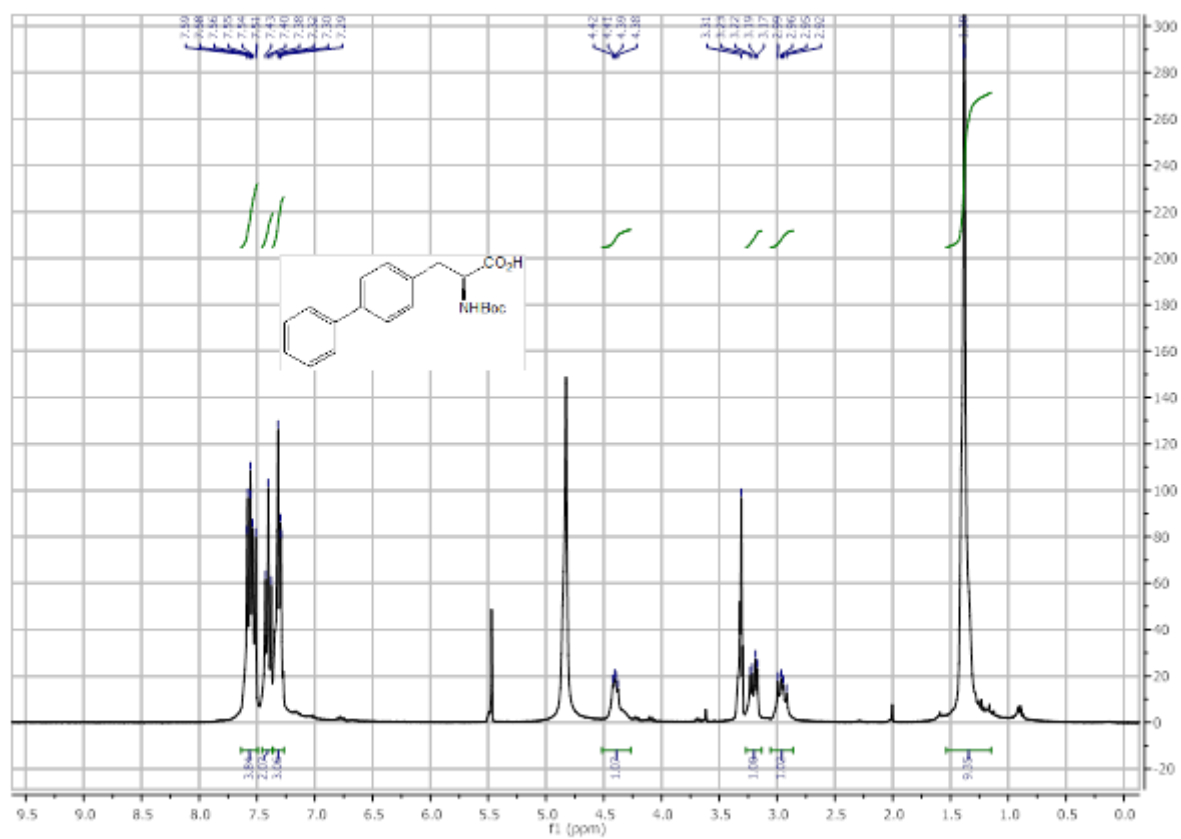

### <sup>13</sup>C NMR 3a

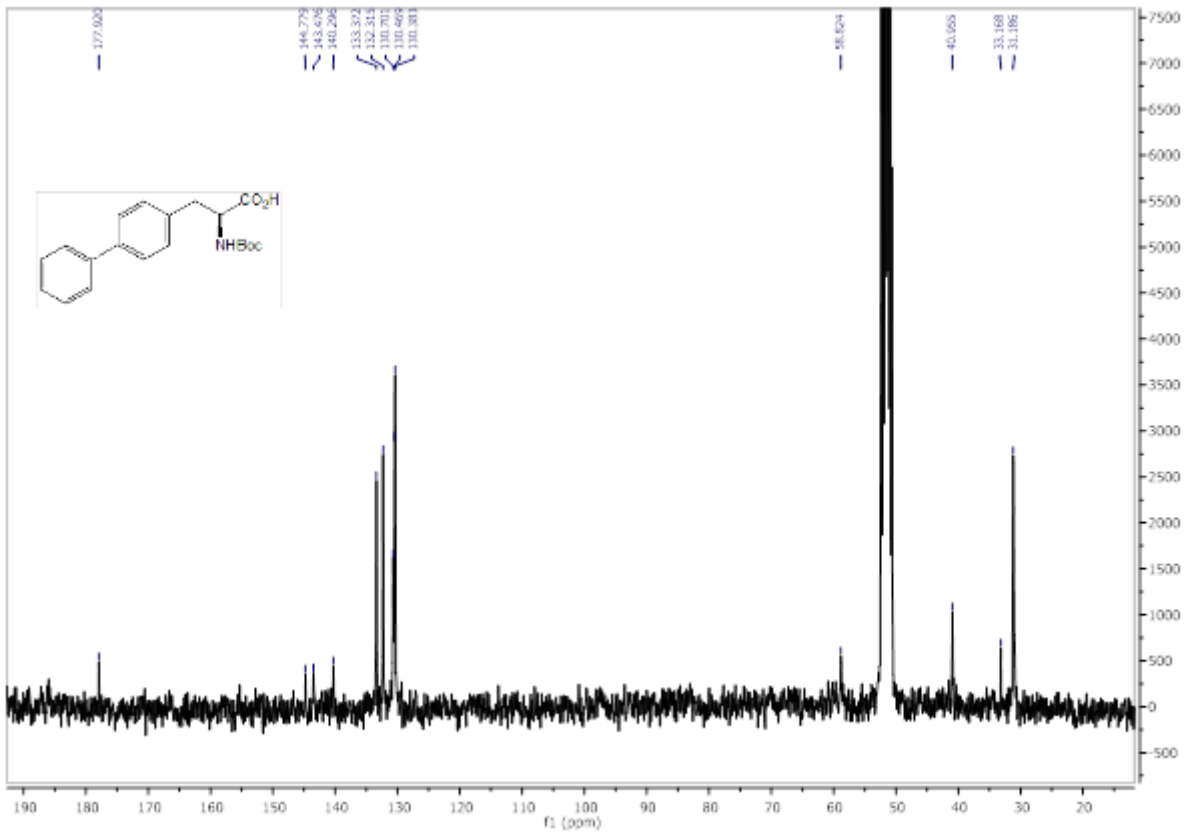

<sup>1</sup>H NMR of **3d**

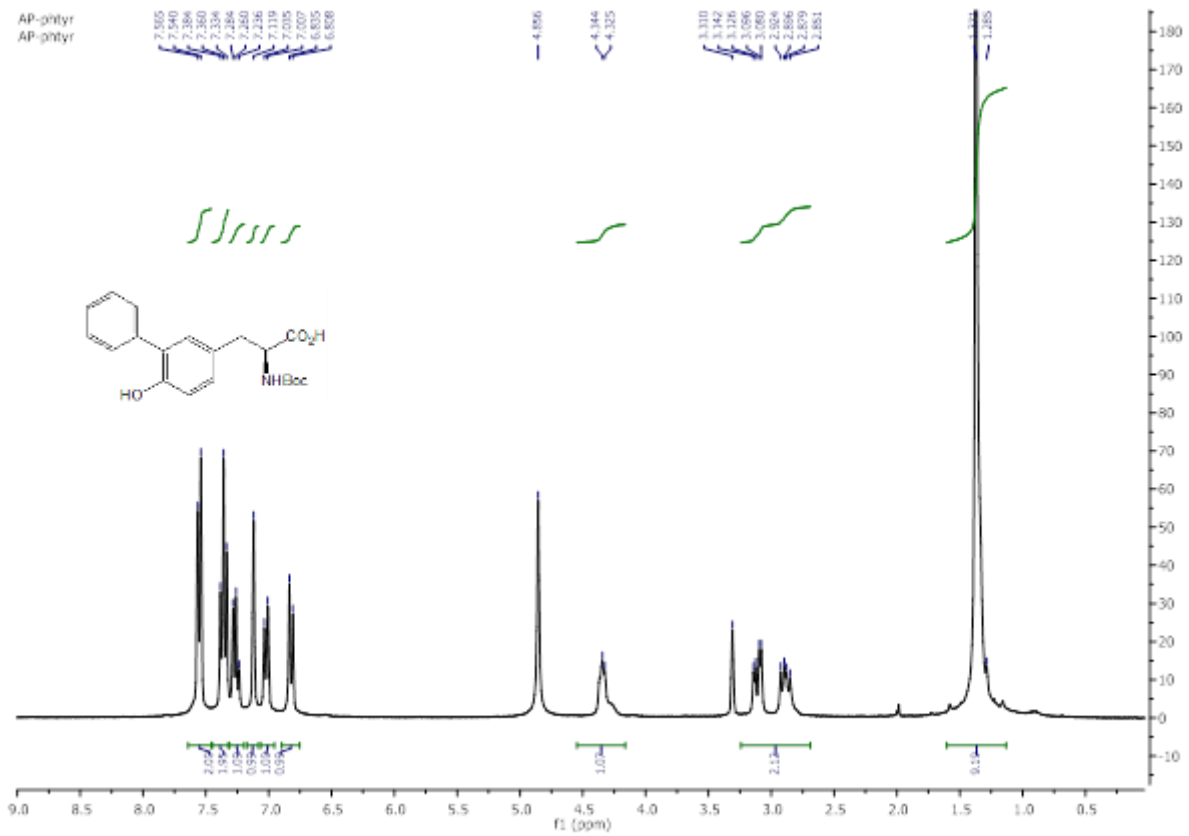

<sup>13</sup>C NMR of **3d**

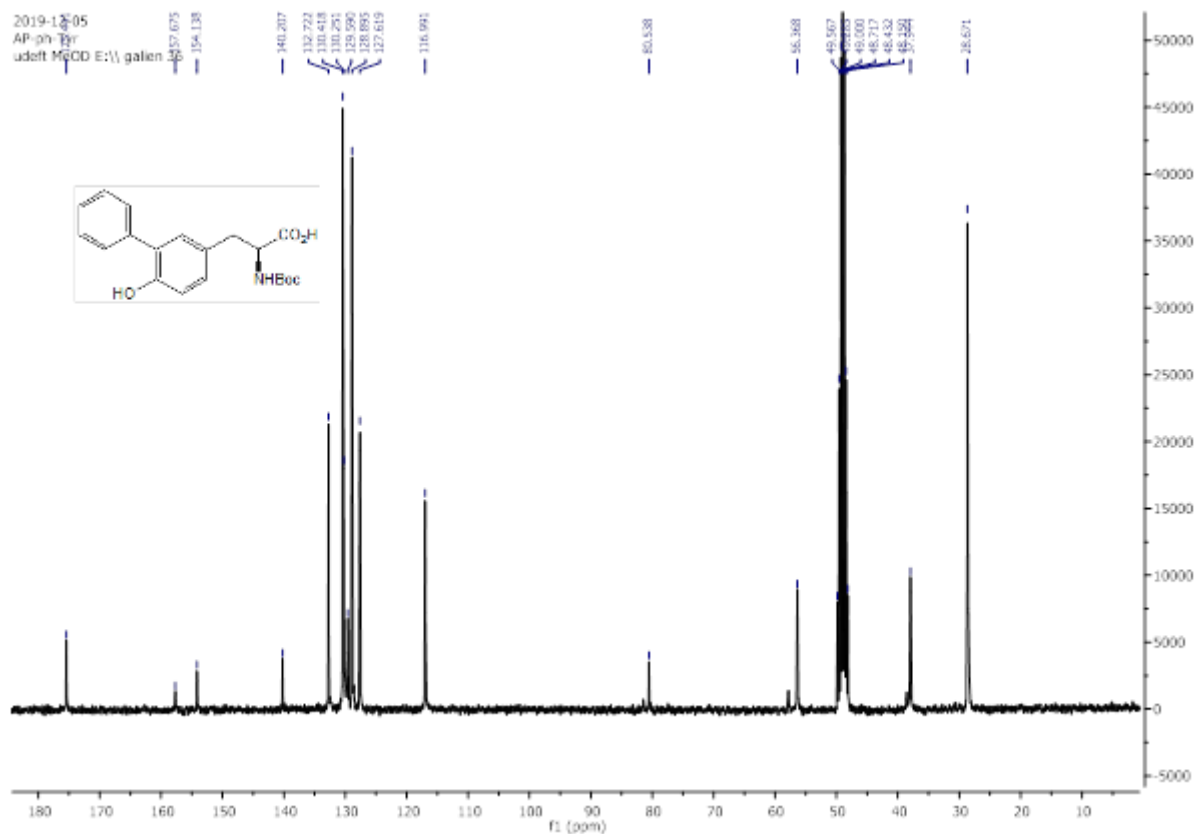

### <sup>1</sup>H NMR 3e

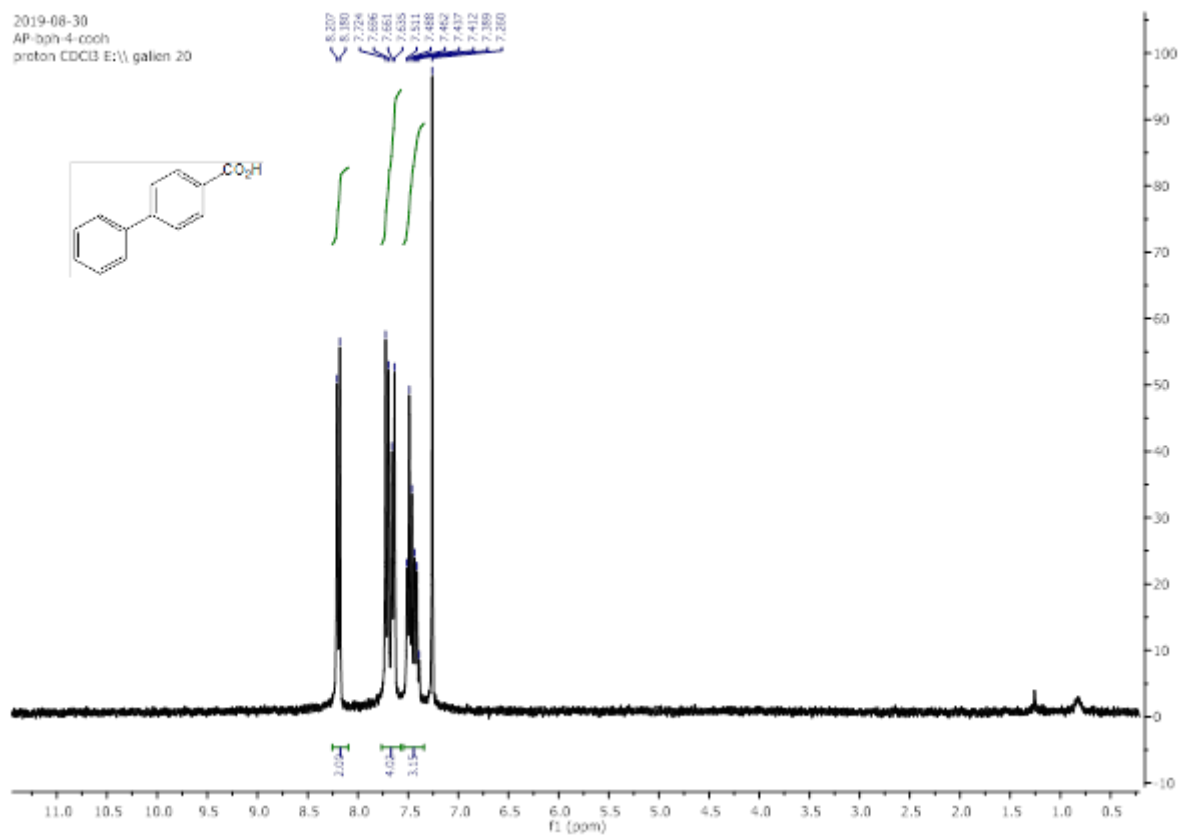

### <sup>13</sup>C NMR 3e

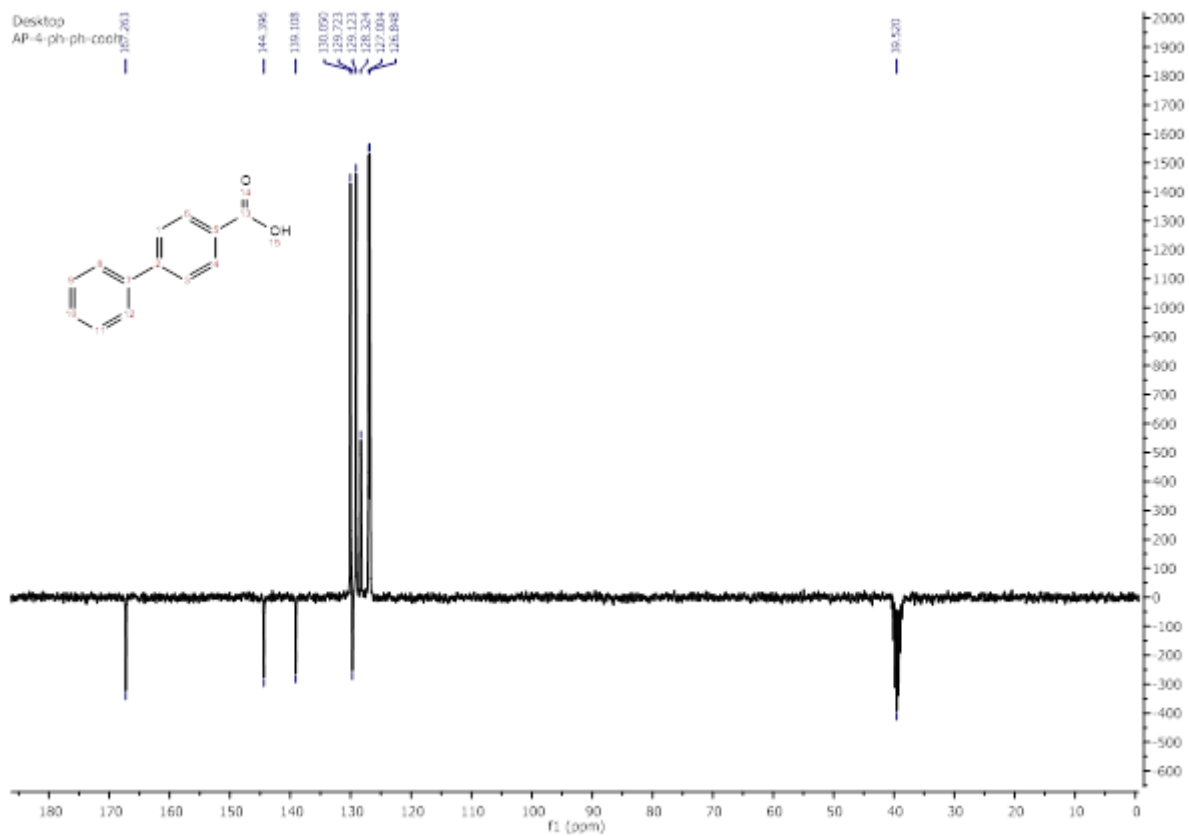

### 1H NMR 3f

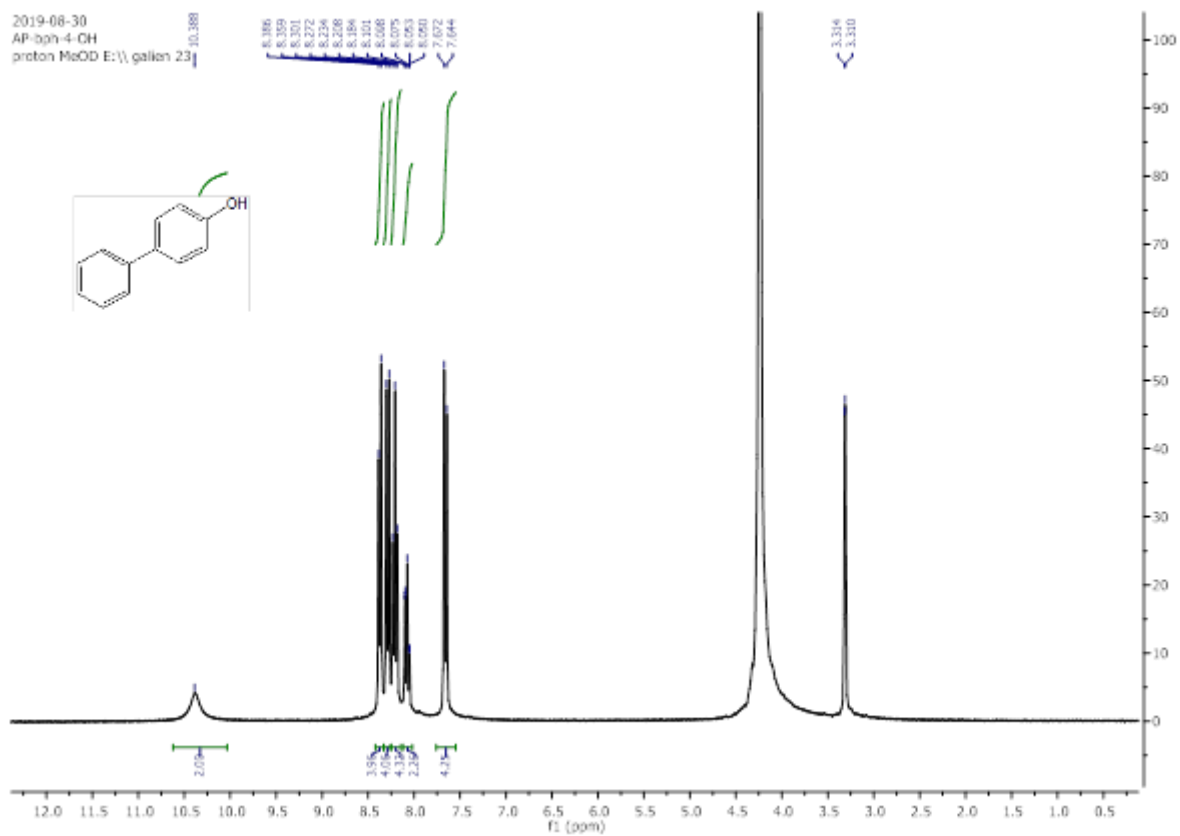

### 13C NMR 3f

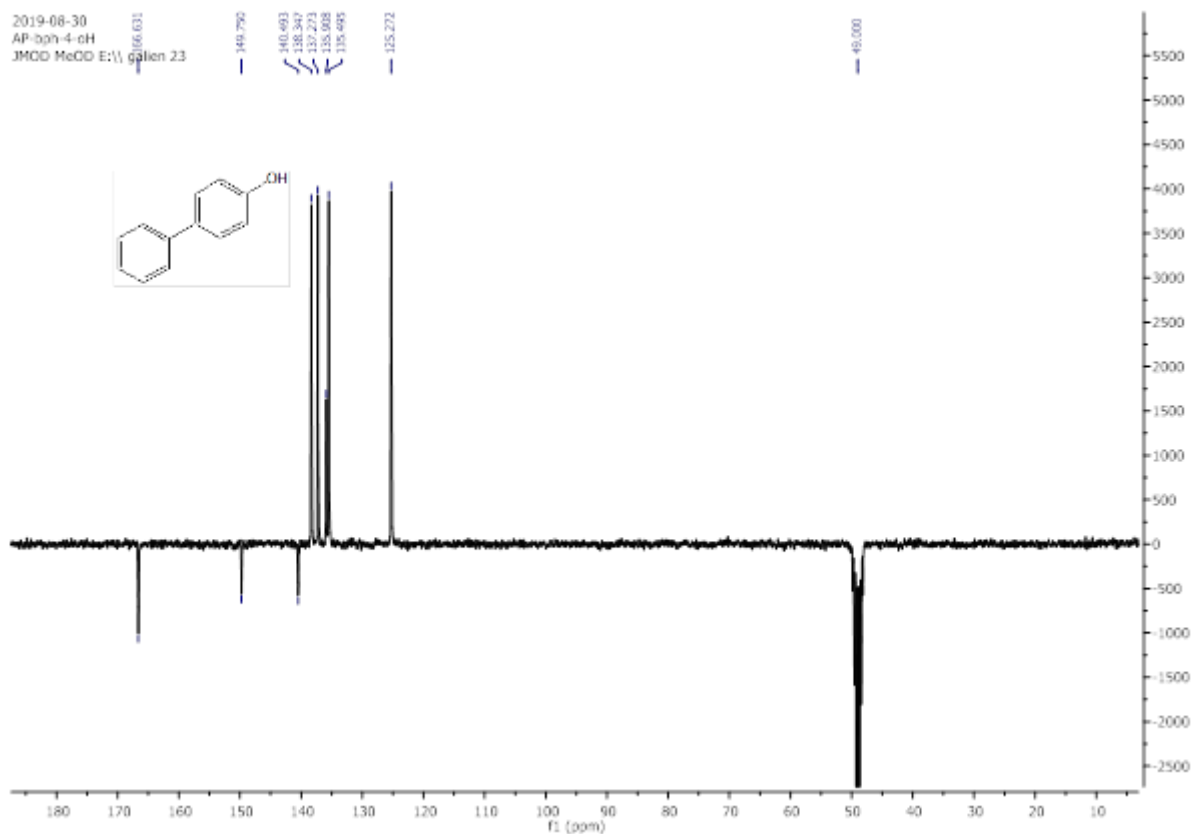

### <sup>1</sup>H NMR 3h

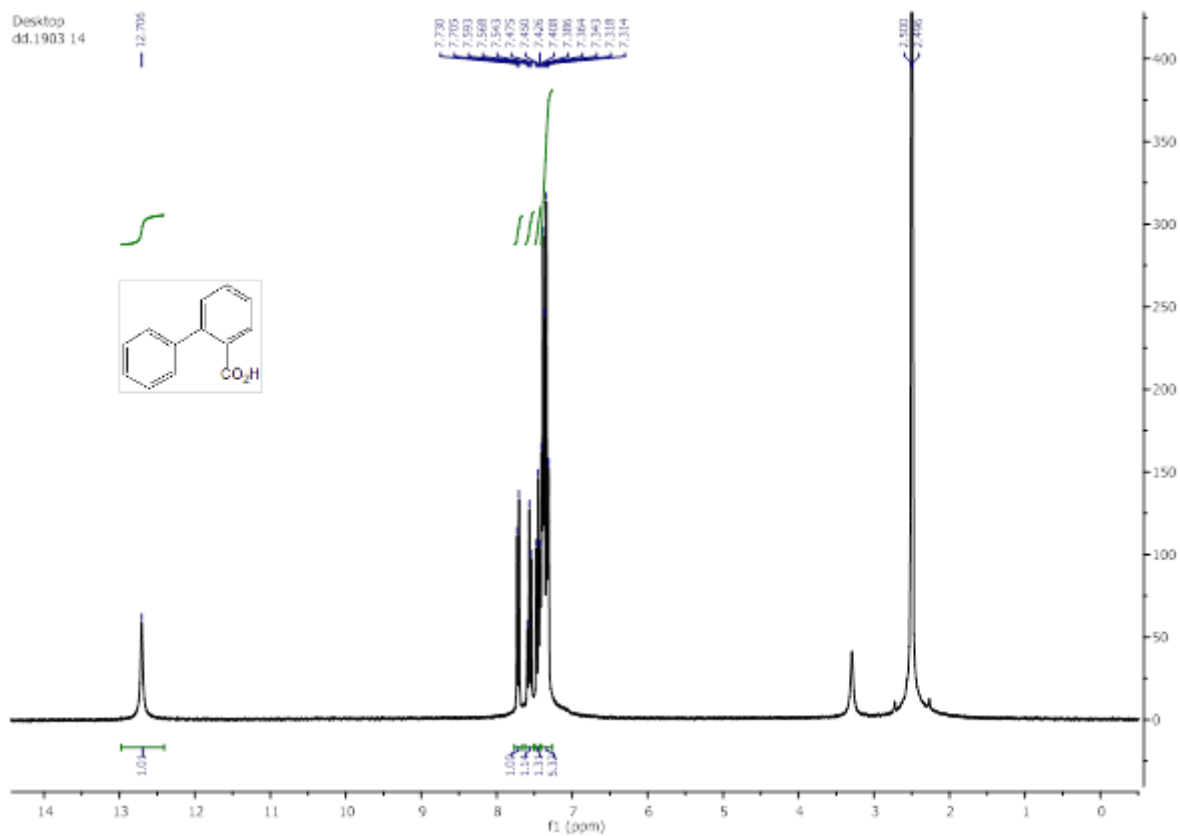

### <sup>13</sup>C NMR 3h

2019-08-30  
AP-nph-2-nph  
JMGG CDCl<sub>3</sub> E:\ galien 21

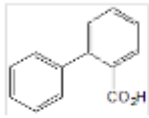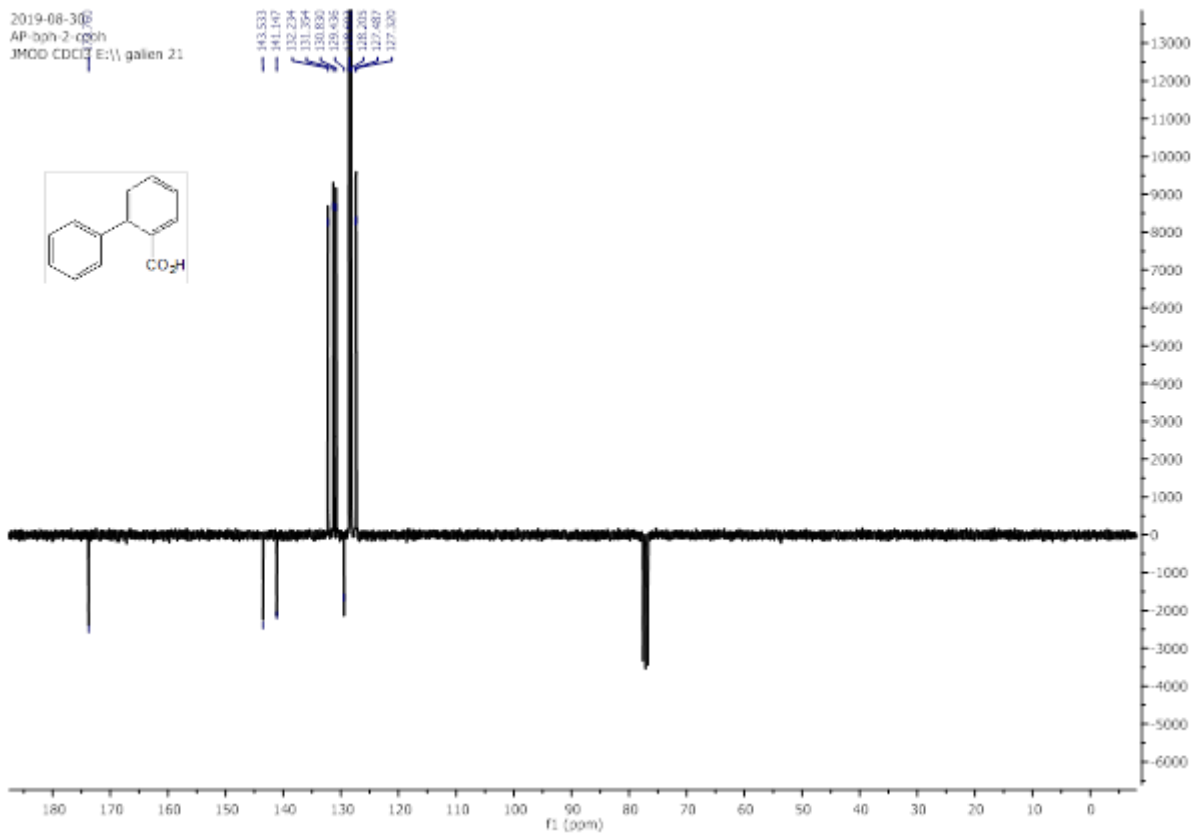

### <sup>1</sup>H NMR 3i

Desktop  
dd.1903 15

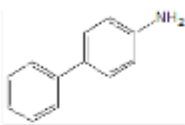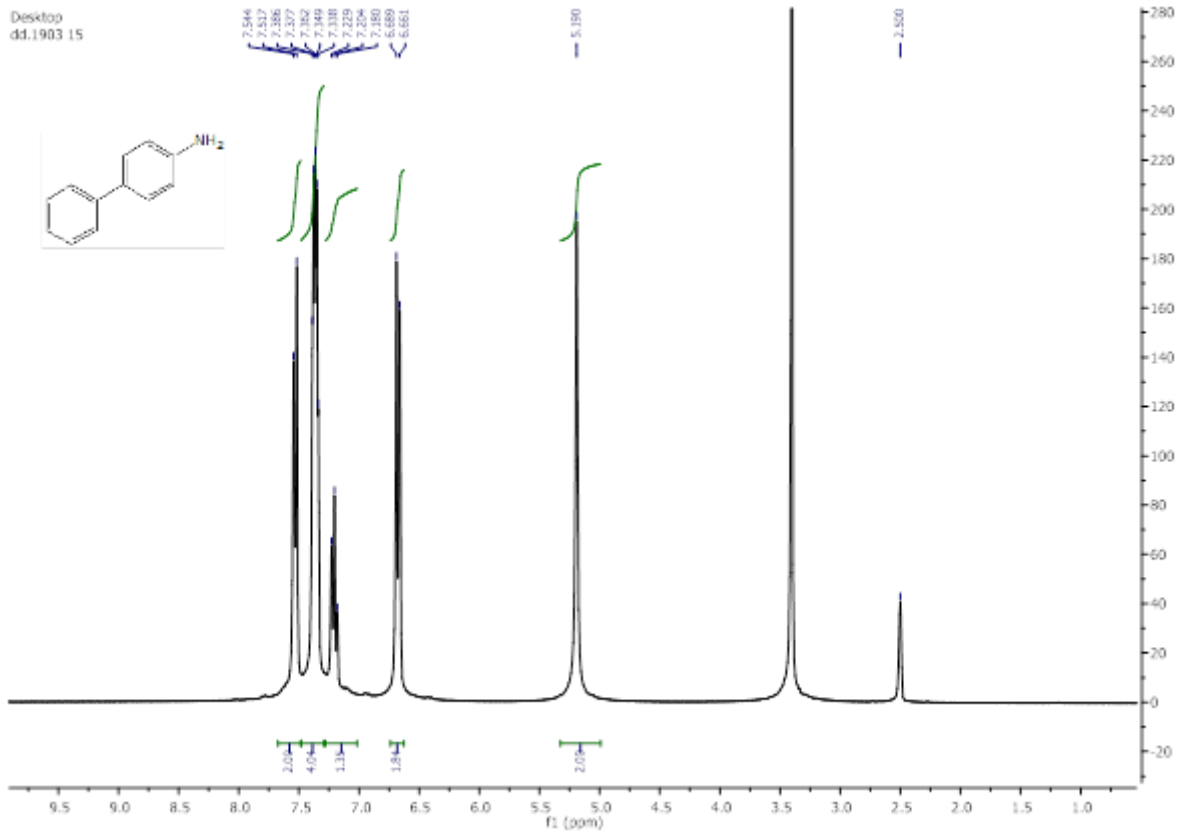

### <sup>13</sup>C NMR 3i

publi calix 26 sept  
dd.1903 16

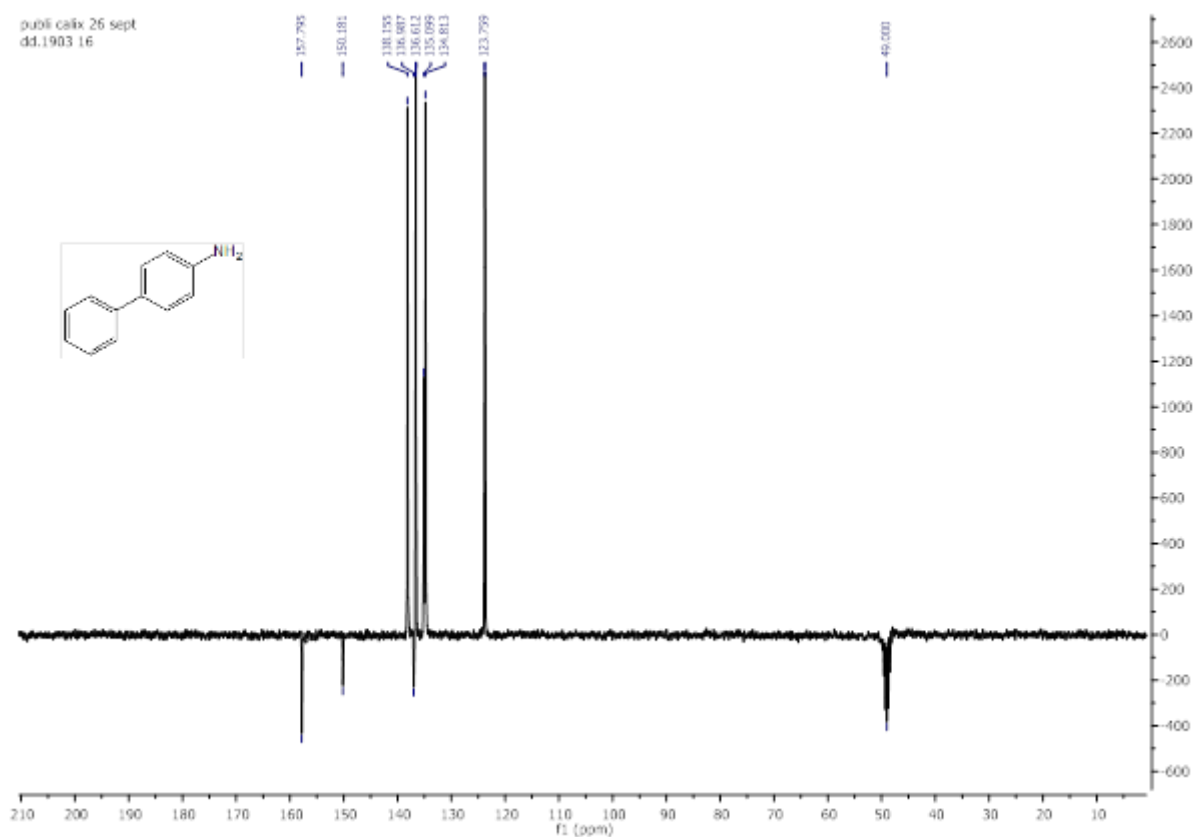

### <sup>1</sup>H NMR 3j

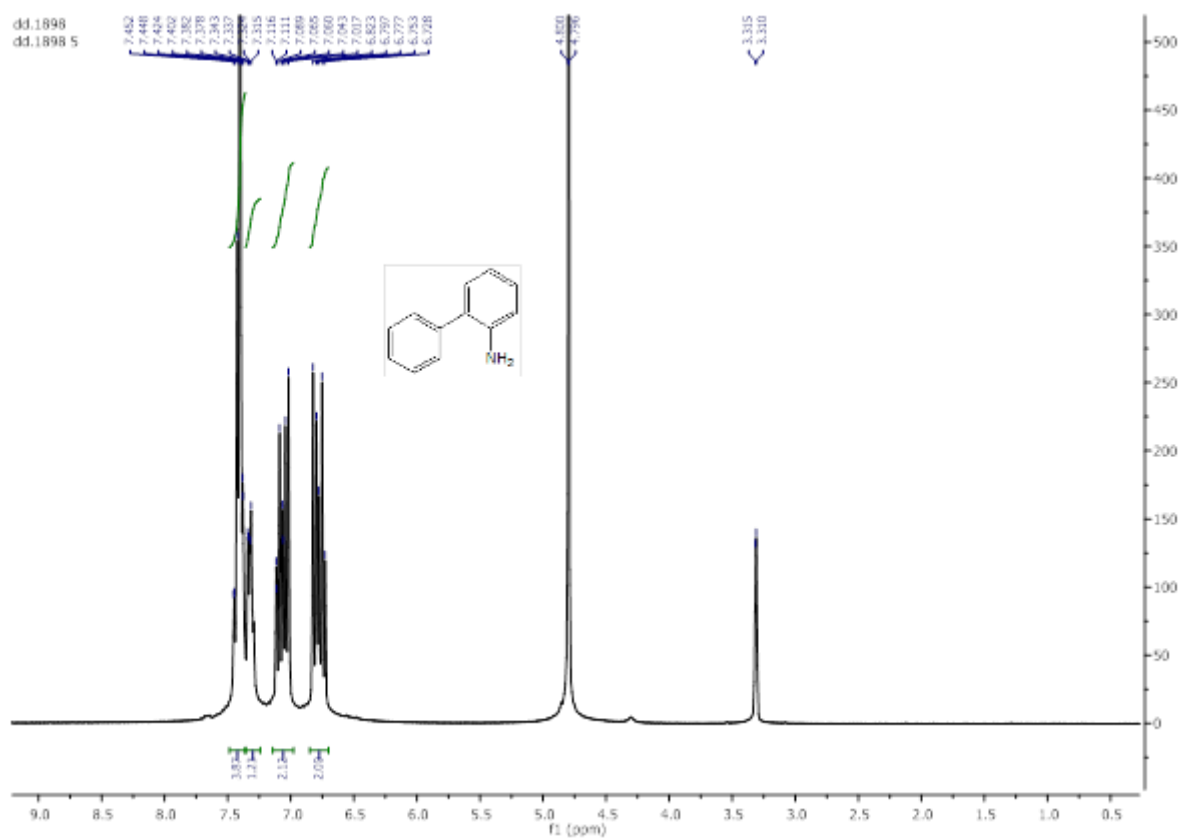

### <sup>13</sup>C NMR 3j

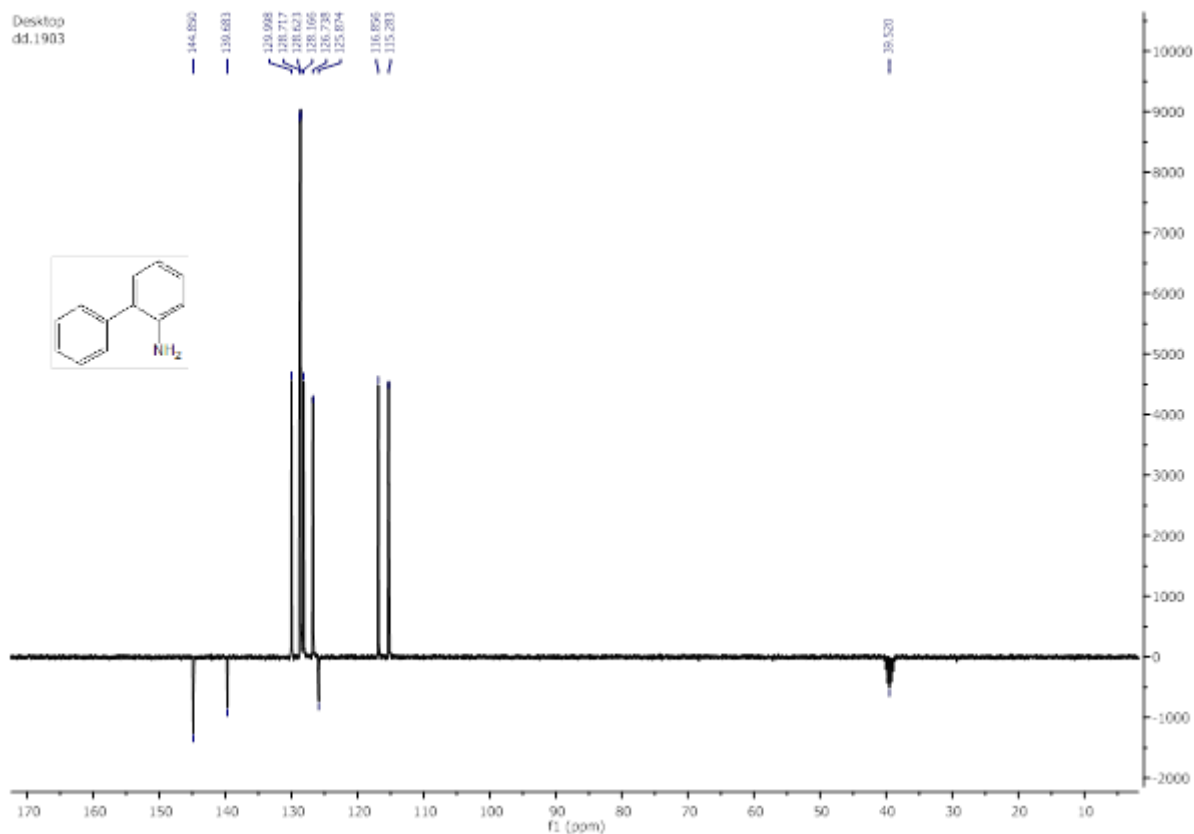

### <sup>1</sup>H NMR 3af

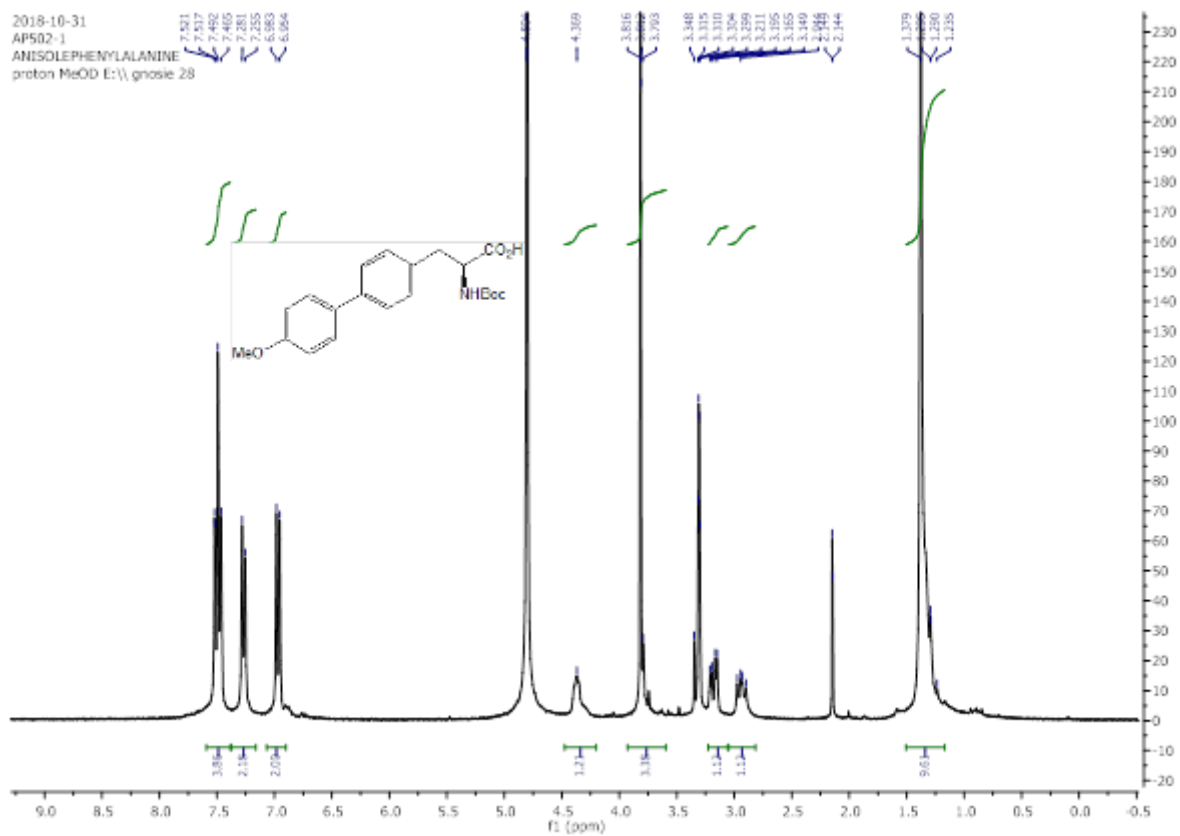

### <sup>13</sup>C NMR 3af



2018-10-31  
 APS02-1  
 ANISOLEPHENYLCALANINE  
 JMOD MeOD E:11 gnosid 28

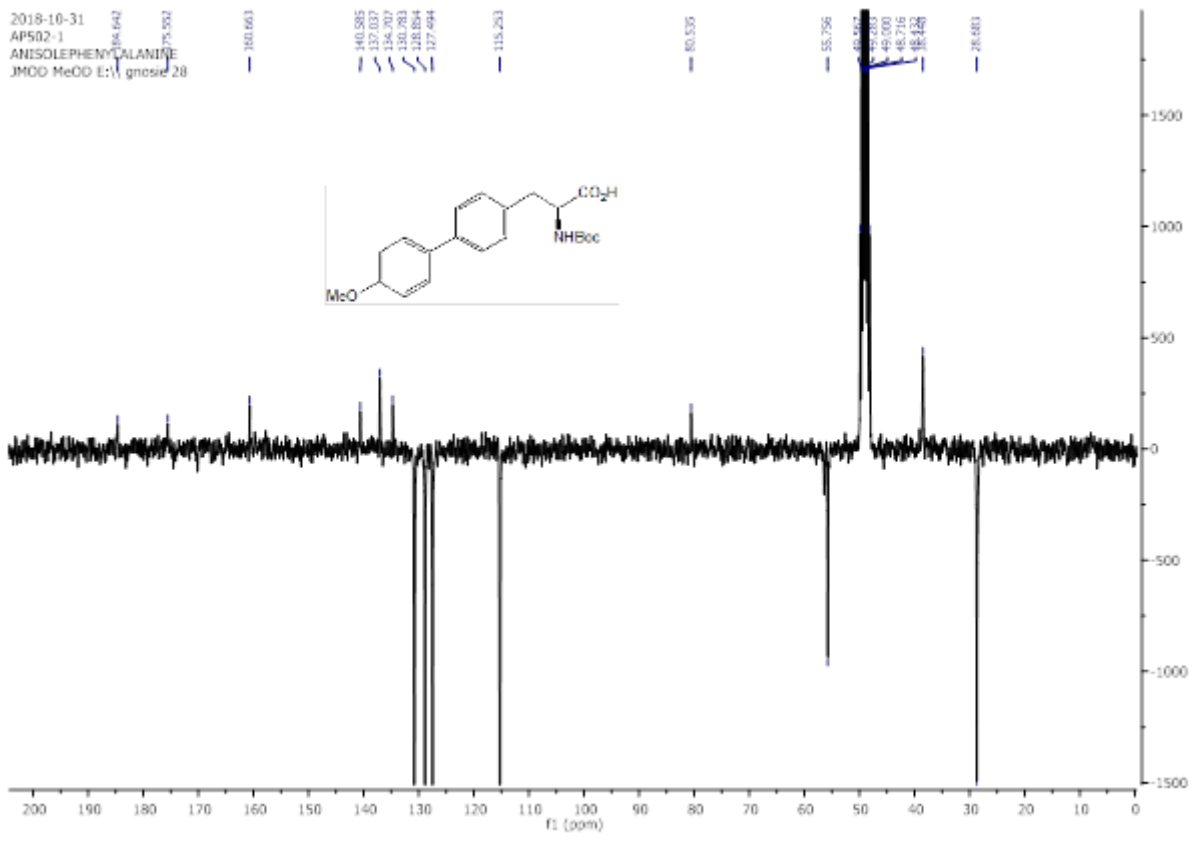

<sup>1</sup>H NMR 3ag

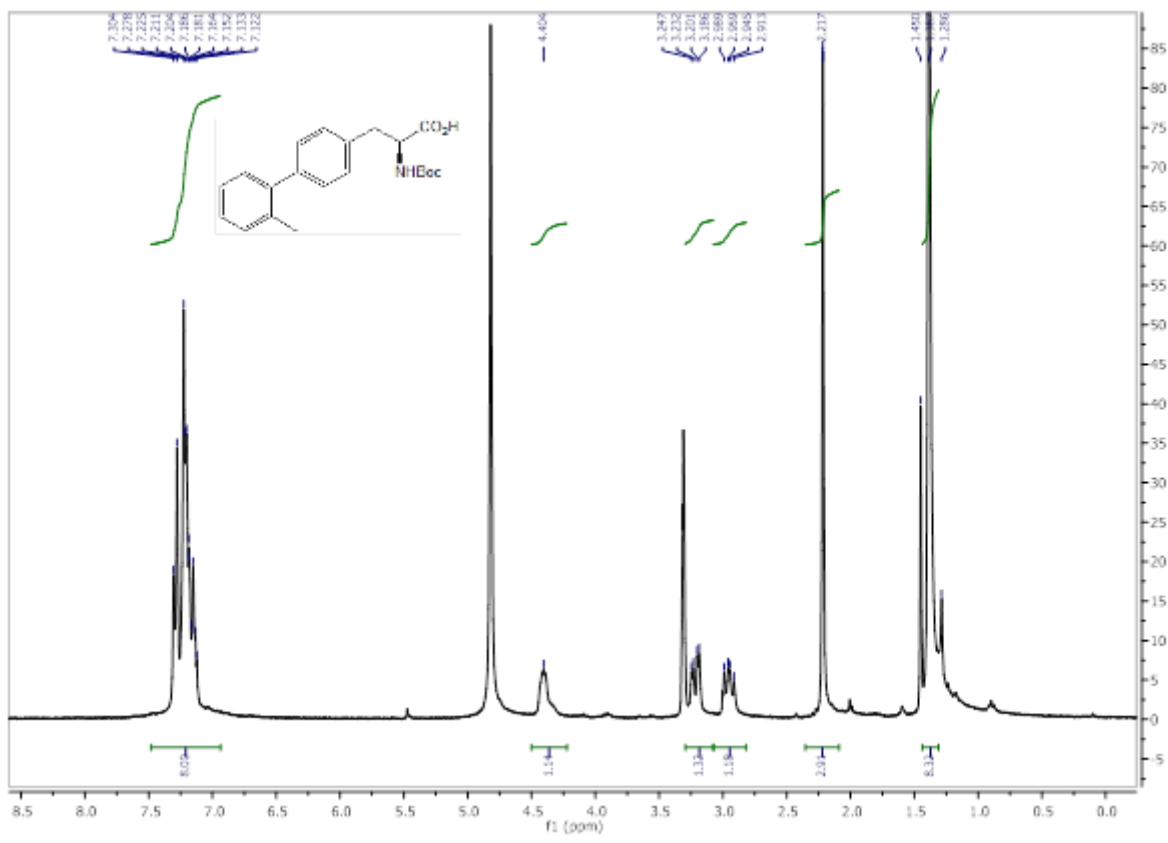

<sup>13</sup>C NMR 3ag

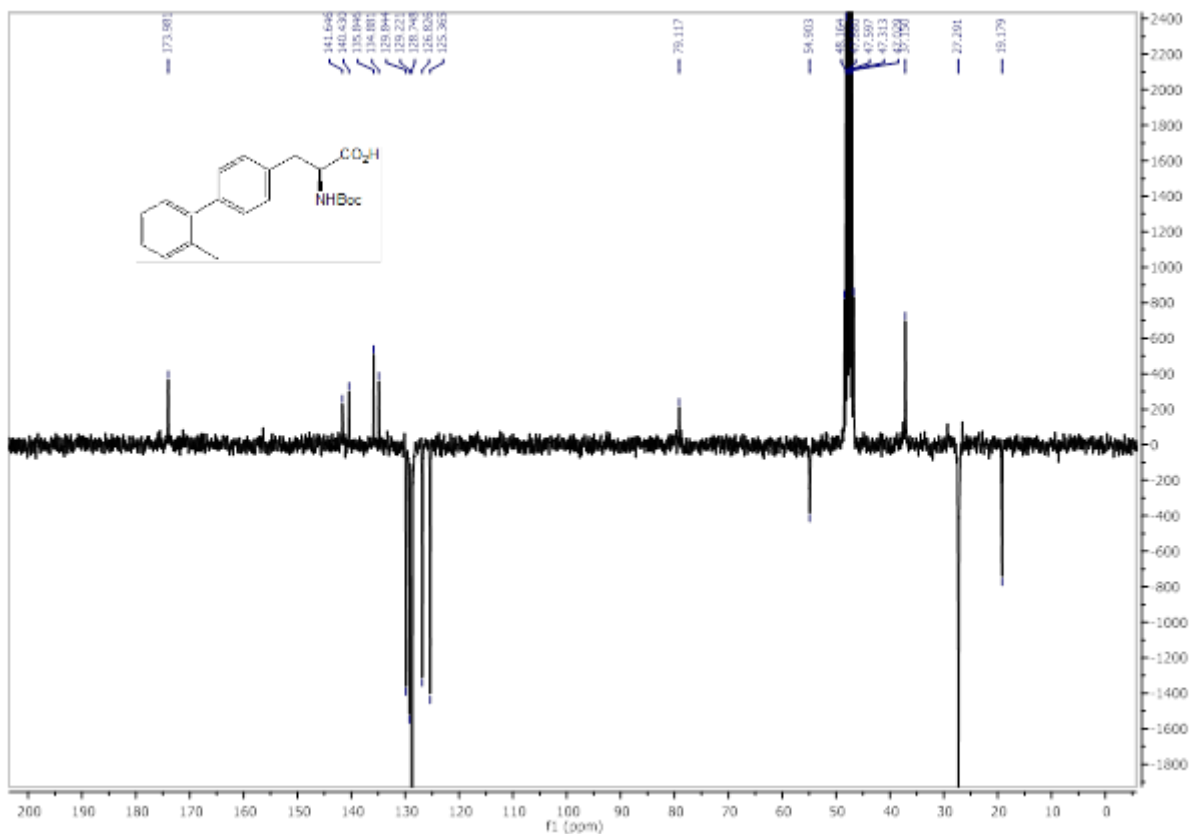

**<sup>1</sup>H NMR 3ah**

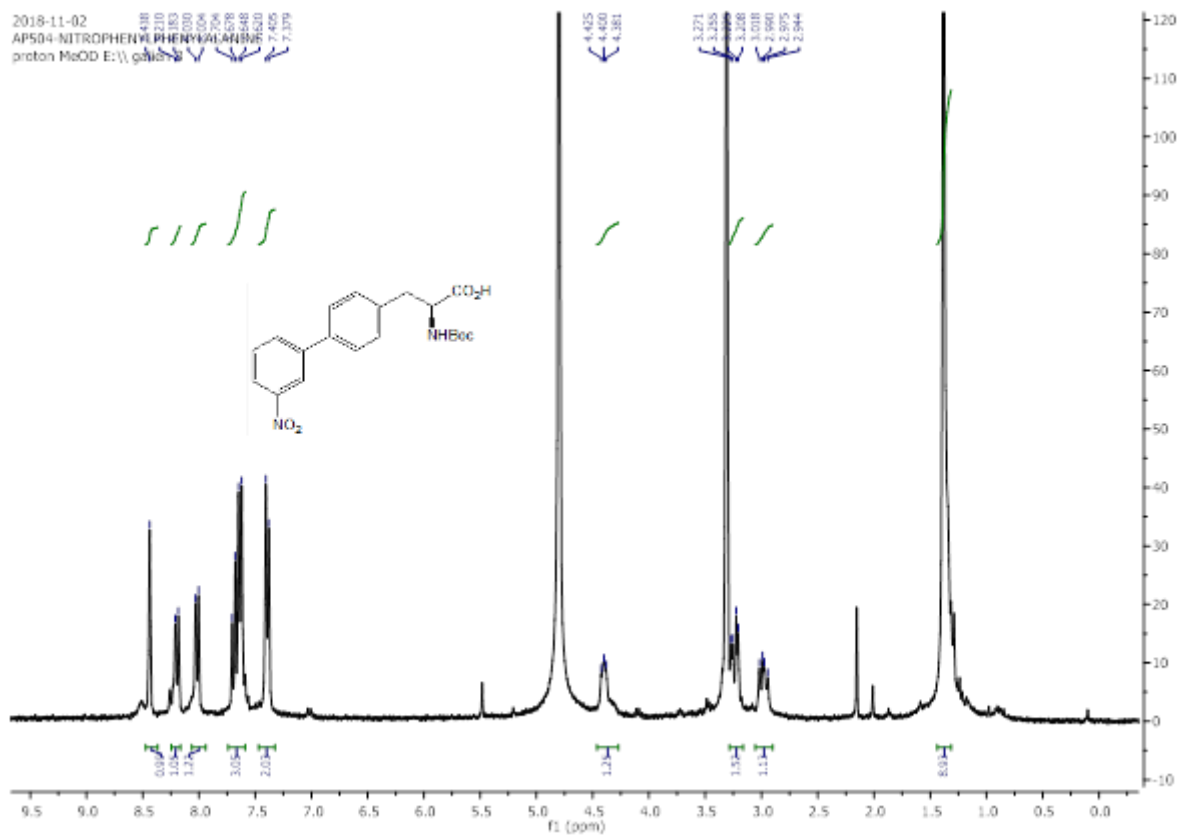

**<sup>13</sup>C NMR 3ah**

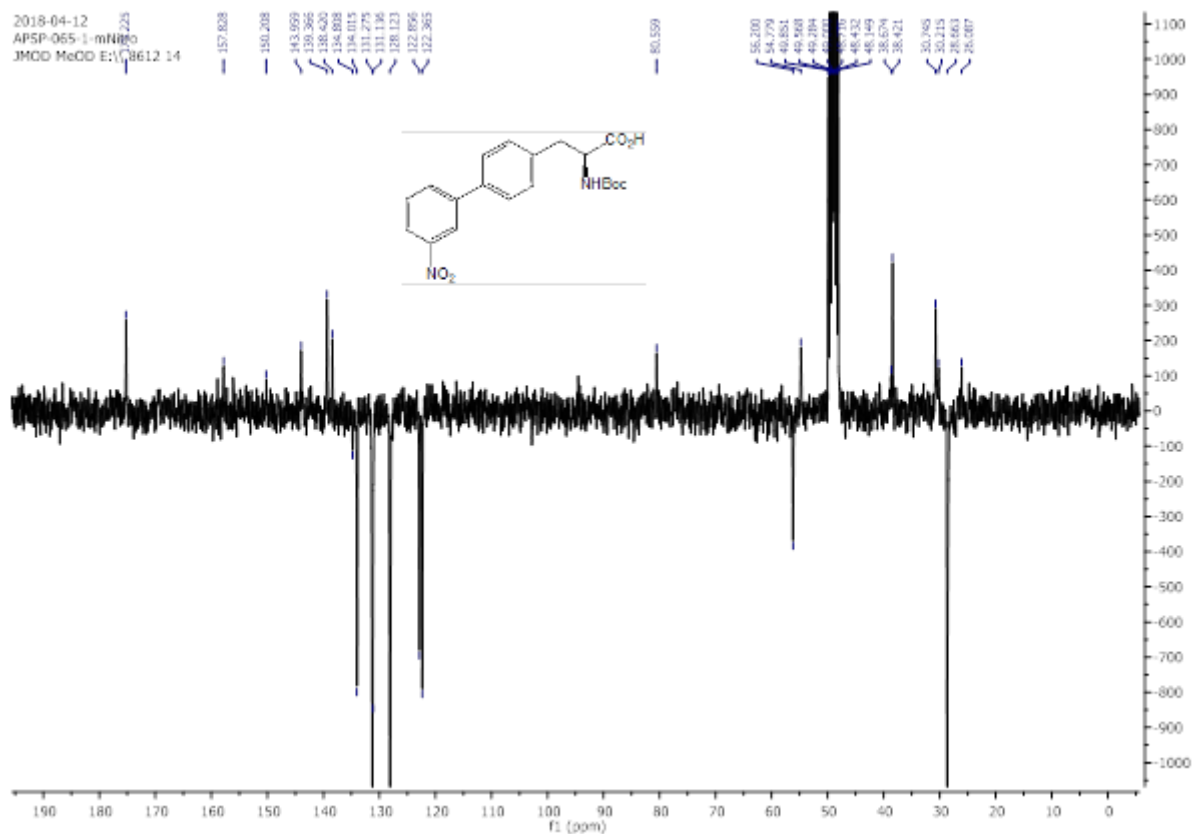

<sup>1</sup>H NMR **3ai**

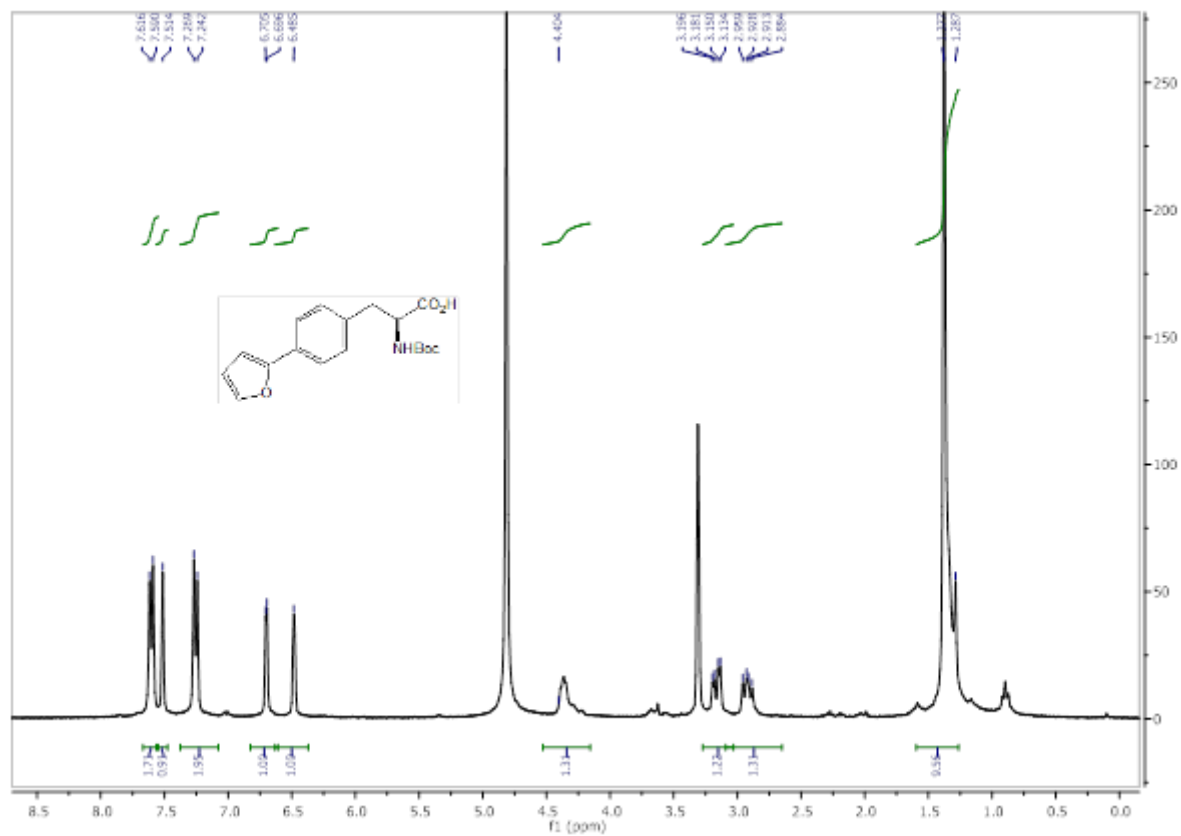

<sup>13</sup>C NMR **3ai**

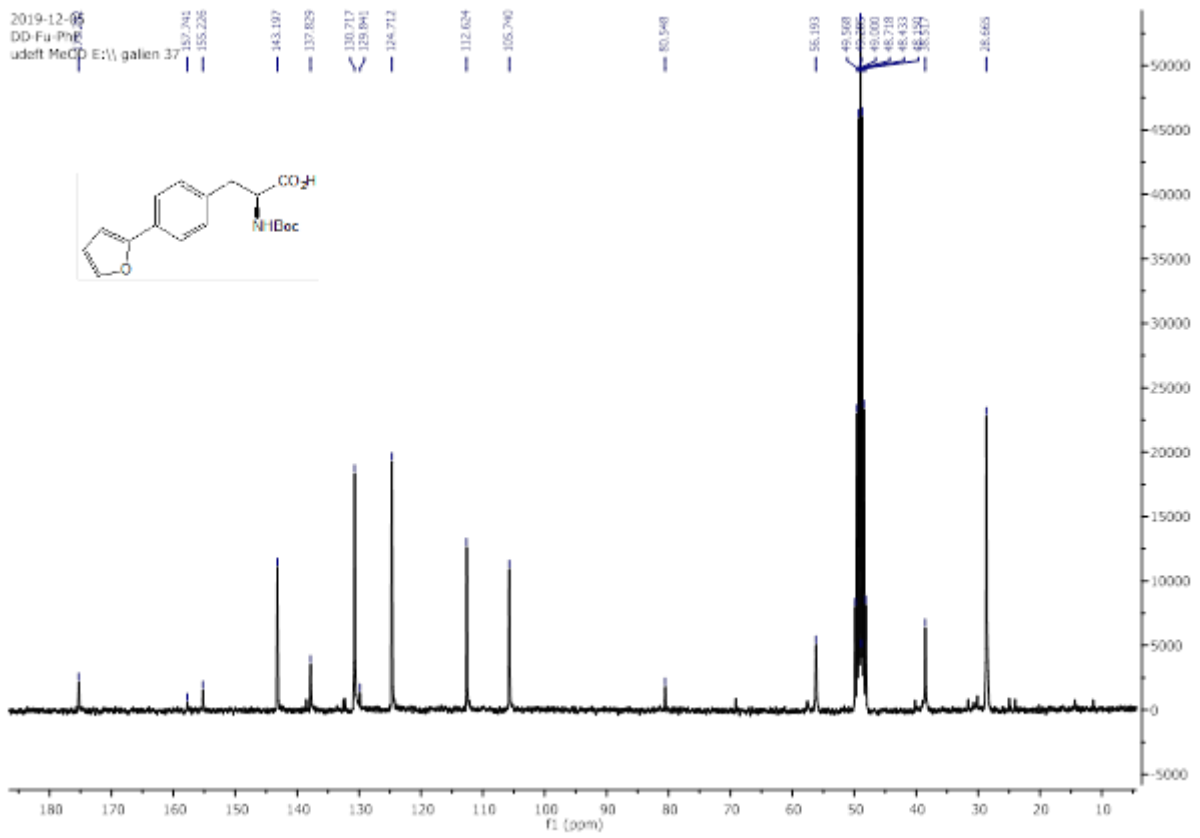

<sup>1</sup>H NMR 3aj

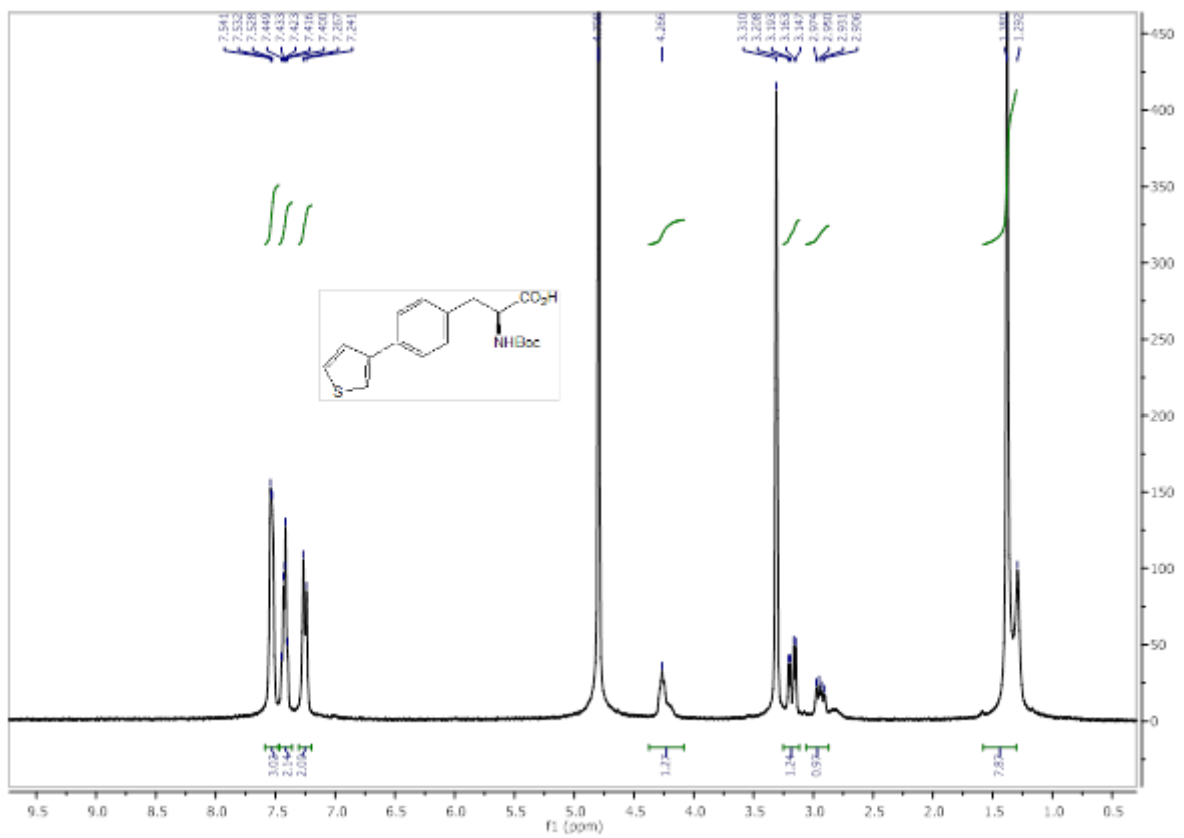

<sup>13</sup>C NMR 3aj

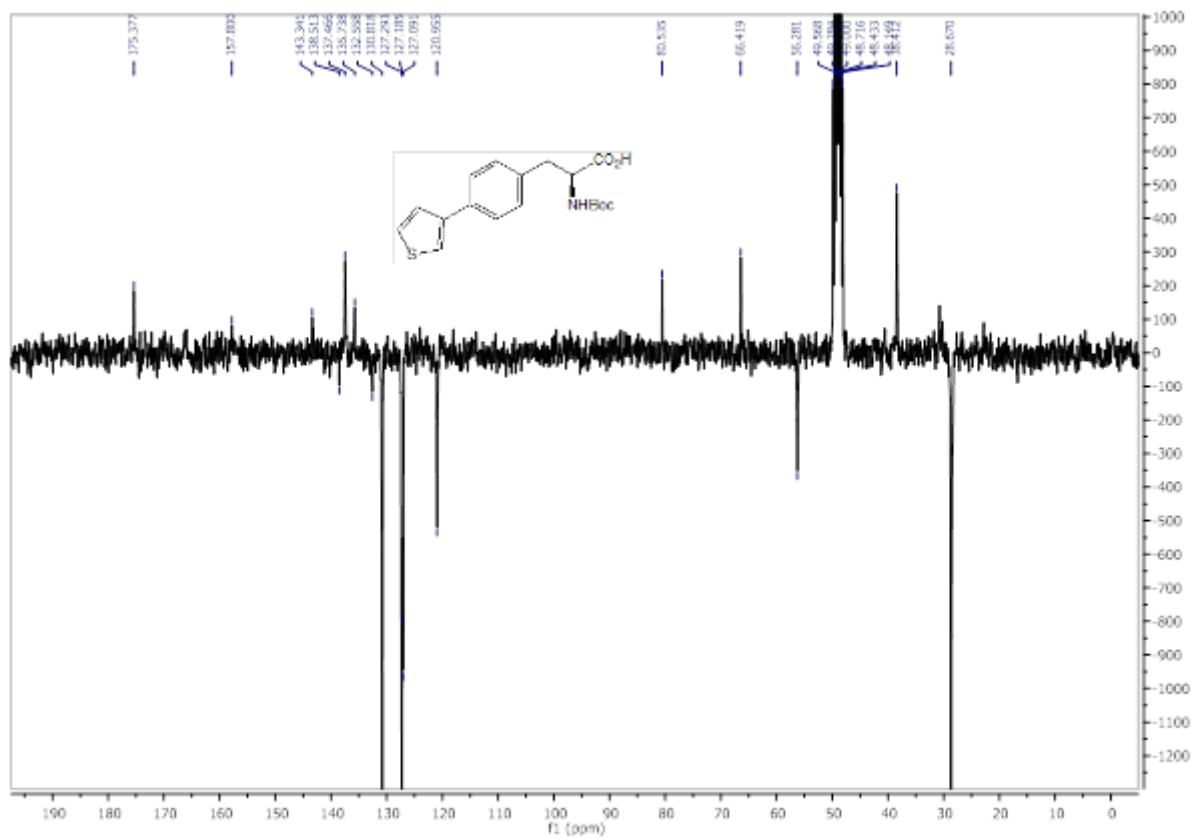

Supplement: molecules-25-01459-s001.pdf [file molecules-25-01459-s001.pdf]
